# Supplementary material for: Azaphilones from the Red Sea Fungus Aspergillus falconensis
Source: PubMed Central journal article supplement (PMC7231052; doi:10.3390/md18040204), 2020-04-10
Supplement: marinedrugs-18-00204-s001.pdf [file marinedrugs-18-00204-s001.pdf]

## Support Information

# Azaphilones from the Red Sea Fungus *Aspergillus falconensis*

**Dina H. El-Kashef**<sup>1,2</sup>, **Fadia S. Youssef**<sup>1,3</sup>, **Rudolf Hartmann**<sup>4</sup>, **Tim-Oliver Knedel**<sup>5</sup>, **Christoph Janiak**<sup>5</sup>, **Wenhan Lin**<sup>6</sup>, **Irene Reimche**<sup>7</sup>, **Nicole Teusch**<sup>7</sup>, **Zhen Liu**<sup>1,\*</sup> and **Peter Proksch**<sup>1,8,\*</sup>

<sup>1</sup> Institute of Pharmaceutical Biology and Biotechnology, Heinrich-Heine-University Duesseldorf, 40225 Duesseldorf, Germany; dina.elkashef@mu.edu.eg (D.H.E.); fadiayoussef@pharma.asu.edu.eg (F.S.Y.)

<sup>2</sup> Department of Pharmacognosy, Faculty of Pharmacy, Minia University, 61519 Minia, Egypt;

<sup>3</sup> Department of Pharmacognosy, Faculty of Pharmacy, Ain Shams University, Abbassia, 11566 Cairo, Egypt;

<sup>4</sup> Institute of Complex Systems: Strukturbiochemie, Forschungszentrum Jülich GmbH, ICS-6, 52425 Jülich, Germany; r.hartmann@fz-juelich.de (R.H.)

<sup>5</sup> Institut für Anorganische Chemie und Strukturchemie, Heinrich-Heine-Universität Düsseldorf, 40225 Düsseldorf, Germany; tim-oliver.knedel@hhu.de (T.O.K.); janiak@uni-duesseldorf.de (C.J.)

<sup>6</sup> State Key Laboratory of Natural and Biomimetic Drugs, Peking University, Beijing 100191, China; whlin@bjmu.edu.cn (W.L.)

<sup>7</sup> Department of Biomedical Sciences, Institute of Health Research and Education, University of Osnabrück, Germany; irene.reimche@uni-osnabrueck.de (I.R.); nicole.teusch@uni-osnabrueck.de (N.T.)

<sup>8</sup> Hubei Key Laboratory of Natural Products Research and Development, College of Biological and Pharmaceutical Sciences, China Three Gorges University, Yichang 443002, People's Republic of China;

\* Correspondence: zhenfeizi0@sina.com (Z.L.); proksch@uni-duesseldorf.de (P.P.); Tel.: +49-211-81-14163

## Contents

|                                                                                                   |    |
|---------------------------------------------------------------------------------------------------|----|
| Figure S1. UV spectrum of compound <b>1</b> .....                                                 | 4  |
| Figure S2. HRESIMS of compound <b>1</b> .....                                                     | 4  |
| Figure S3. <sup>1</sup> H NMR (600 MHz, CDCl <sub>3</sub> ) spectrum of compound <b>1</b> .....   | 5  |
| Figure S4. COSY (600 MHz, CDCl <sub>3</sub> ) spectrum of compound <b>1</b> .....                 | 6  |
| Figure S5. HSQC (600 MHz/150 MHz, CDCl <sub>3</sub> ) spectrum of compound <b>1</b> .....         | 7  |
| Figure S6. HMBC (600 MHz/150 MHz, CDCl <sub>3</sub> ) spectrum of compound <b>1</b> .....         | 8  |
| Figure S7. ROESY (600 MHz, CDCl <sub>3</sub> ) spectrum of compound <b>1</b> .....                | 9  |
| Figure S8. UV spectrum of compound <b>2</b> .....                                                 | 10 |
| Figure S9. HRESIMS of compound <b>2</b> .....                                                     | 10 |
| Figure S10. <sup>1</sup> H NMR (600 MHz, CDCl <sub>3</sub> ) spectrum of compound <b>2</b> .....  | 11 |
| Figure S11. COSY (600 MHz, CDCl <sub>3</sub> ) spectrum of compound <b>2</b> .....                | 12 |
| Figure S12. HSQC (600 MHz/150 MHz, CDCl <sub>3</sub> ) spectrum of compound <b>2</b> .....        | 13 |
| Figure S13. HMBC (600 MHz/150 MHz, CDCl <sub>3</sub> ) spectrum of compound <b>2</b> .....        | 14 |
| Figure S14. ROESY (600 MHz, CDCl <sub>3</sub> ) spectrum of compound <b>2</b> .....               | 15 |
| Figure S15. UV spectrum of compound <b>7</b> .....                                                | 16 |
| Figure S16. HRESIMS of compound <b>7</b> .....                                                    | 16 |
| Figure S17. <sup>1</sup> H NMR (700 MHz, CDCl <sub>3</sub> ) spectrum of compound <b>7</b> .....  | 17 |
| Figure S18. <sup>13</sup> C NMR (175 MHz, CDCl <sub>3</sub> ) spectrum of compound <b>7</b> ..... | 18 |
| Figure S19. COSY (700 MHz, CDCl <sub>3</sub> ) spectrum of compound <b>7</b> .....                | 19 |
| Figure S20. HSQC (700 MHz/175 MHz, CDCl <sub>3</sub> ) spectrum of compound <b>7</b> .....        | 20 |
| Figure S21. HMBC (700 MHz/175 MHz, CDCl <sub>3</sub> ) spectrum of compound <b>7</b> .....        | 21 |
| Figure S22. ROESY (700 MHz/175 MHz, CDCl <sub>3</sub> ) spectrum of compound <b>7</b> .....       | 22 |
| Figure S23. UV spectrum of compound <b>8</b> .....                                                | 23 |
| Figure S24. HRESIMS of compound <b>8</b> .....                                                    | 23 |
| Figure S25. <sup>1</sup> H NMR (600 MHz, CDCl <sub>3</sub> ) spectrum of compound <b>8</b> .....  | 24 |
| Figure S26. COSY (600 MHz, CDCl <sub>3</sub> ) spectrum of compound <b>8</b> .....                | 25 |
| Figure S27. HSQC (600 MHz/150 MHz, CDCl <sub>3</sub> ) spectrum of compound <b>8</b> .....        | 26 |
| Figure S28. HMBC (600 MHz/150 MHz, CDCl <sub>3</sub> ) spectrum of compound <b>8</b> .....        | 27 |
| Figure S29. ROESY (600 MHz, CDCl <sub>3</sub> ) spectrum of compound <b>8</b> .....               | 28 |
| Figure S30. UV spectrum of compound <b>9</b> .....                                                | 29 |
| Figure S31. HRESIMS of compound <b>9</b> .....                                                    | 29 |
| Figure S32. <sup>1</sup> H NMR (700 MHz, CDCl <sub>3</sub> ) spectrum of compound <b>9</b> .....  | 30 |
| Figure S33. <sup>13</sup> C NMR (175 MHz, CDCl <sub>3</sub> ) spectrum of compound <b>9</b> ..... | 31 |
| Figure S34. COSY (700 MHz, CDCl <sub>3</sub> ) spectrum of compound <b>9</b> .....                | 32 |

|                                                                                                                                                                                                                           |    |
|---------------------------------------------------------------------------------------------------------------------------------------------------------------------------------------------------------------------------|----|
| Figure S35. HSQC (700 MHz/175 MHz, CDCl <sub>3</sub> ) spectrum of compound <b>9</b> . .....                                                                                                                              | 33 |
| Figure S36. HMBC (700 MHz/175 MHz, CDCl <sub>3</sub> ) spectrum of compound <b>9</b> . .....                                                                                                                              | 34 |
| Figure S37. ROESY (700 MHz, CDCl <sub>3</sub> ) spectrum of compound <b>9</b> . .....                                                                                                                                     | 35 |
| Figure S38. Section of the packing diagram over an extended unit cell of compound <b>5</b> (50% thermal ellipsoids) determined by single-crystal x-ray diffraction. Hydrogen bonds are shown in dashed yellow lines. .... | 36 |
| Figure S39. NFκB inhibitory potential of the compounds <b>1, 3, 4, 5, 6, 7, 8, 9</b> and <b>11</b> . ....                                                                                                                 | 37 |
| Figure S40. Potency in NFκB inhibition versus cytotoxicity. ....                                                                                                                                                          | 38 |
| Table S1: Crystal data for compound <b>5</b> . ....                                                                                                                                                                       | 39 |
| Table S2. Fractional atomic coordinates and isotropic or equivalent isotropic displacement parameters (Å <sup>2</sup> ) for compound <b>5</b> . ....                                                                      | 40 |
| Table S3. Atomic displacement parameters (Å <sup>2</sup> ) for compound <b>5</b> . ....                                                                                                                                   | 42 |
| Table S4. Geometric parameters (Å, °) for compound <b>5</b> . ....                                                                                                                                                        | 43 |
| Table S5. Hydrogen-bond geometry (Å, °) for compound <b>5</b> . ....                                                                                                                                                      | 45 |

Figure S1. UV spectrum of compound 1.

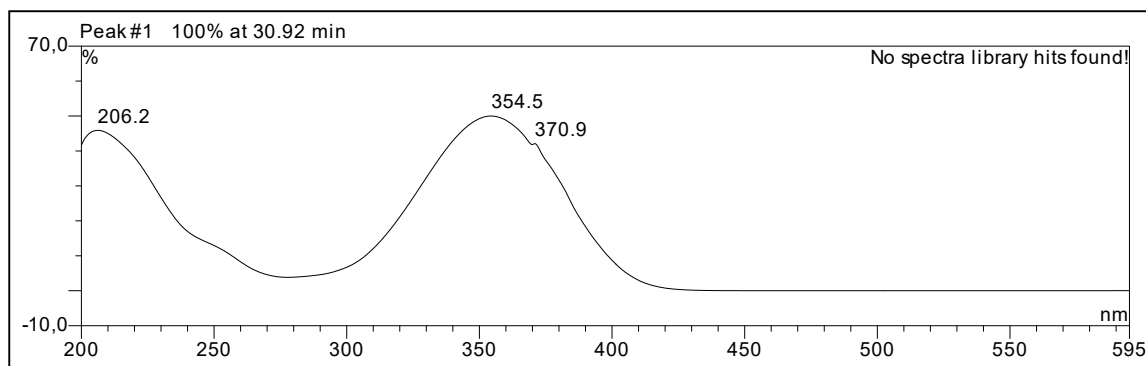

Figure S2. HRESIMS of compound 1.

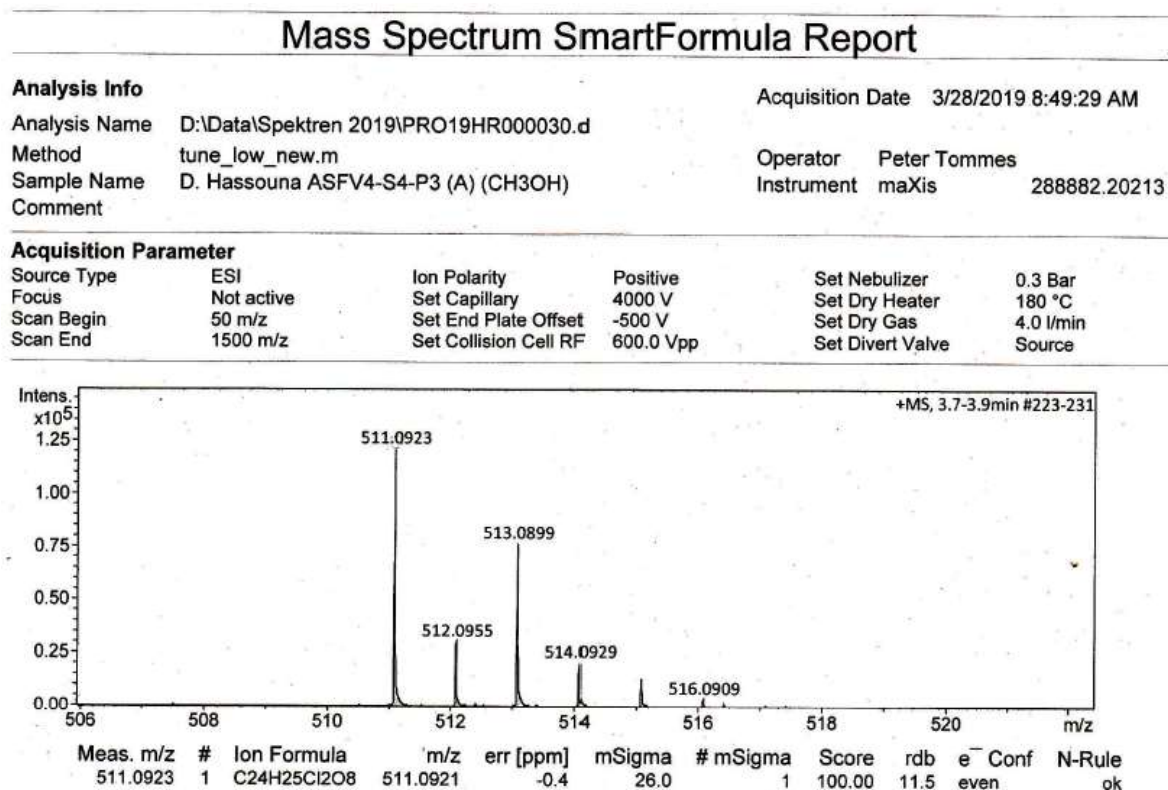

Figure S3.  $^1\text{H}$  NMR (600 MHz,  $\text{CDCl}_3$ ) spectrum of compound **1**.

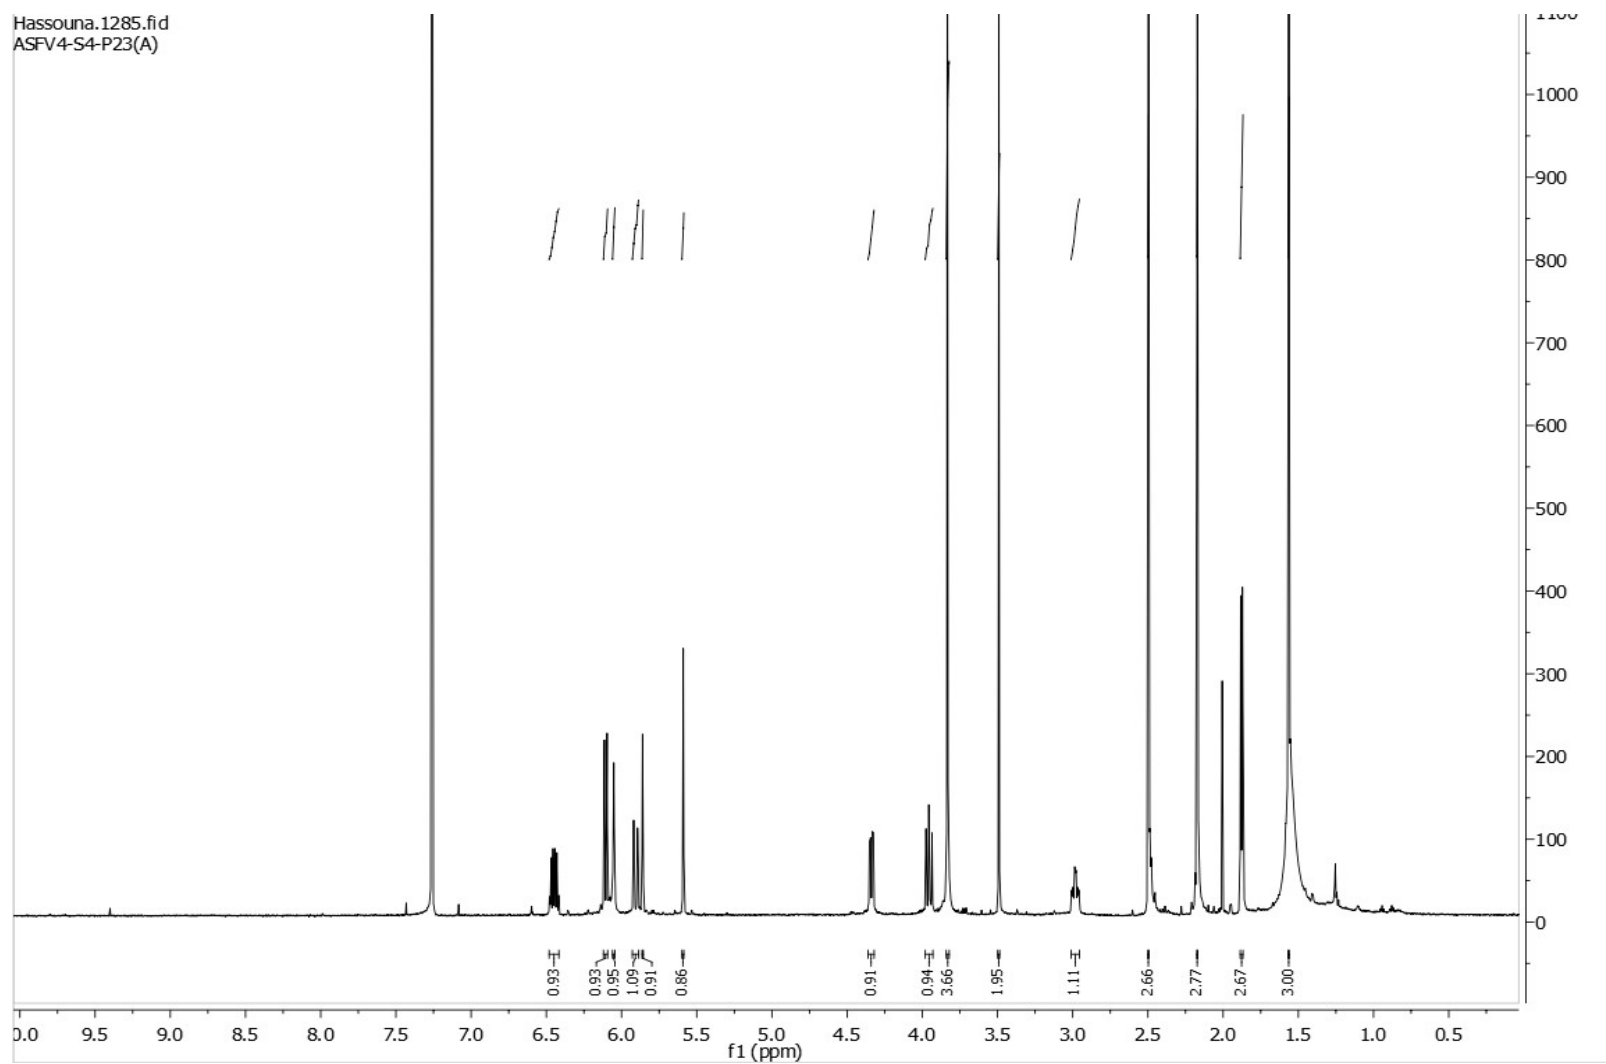

Figure S4. COSY (600 MHz, CDCl<sub>3</sub>) spectrum of compound **1**.

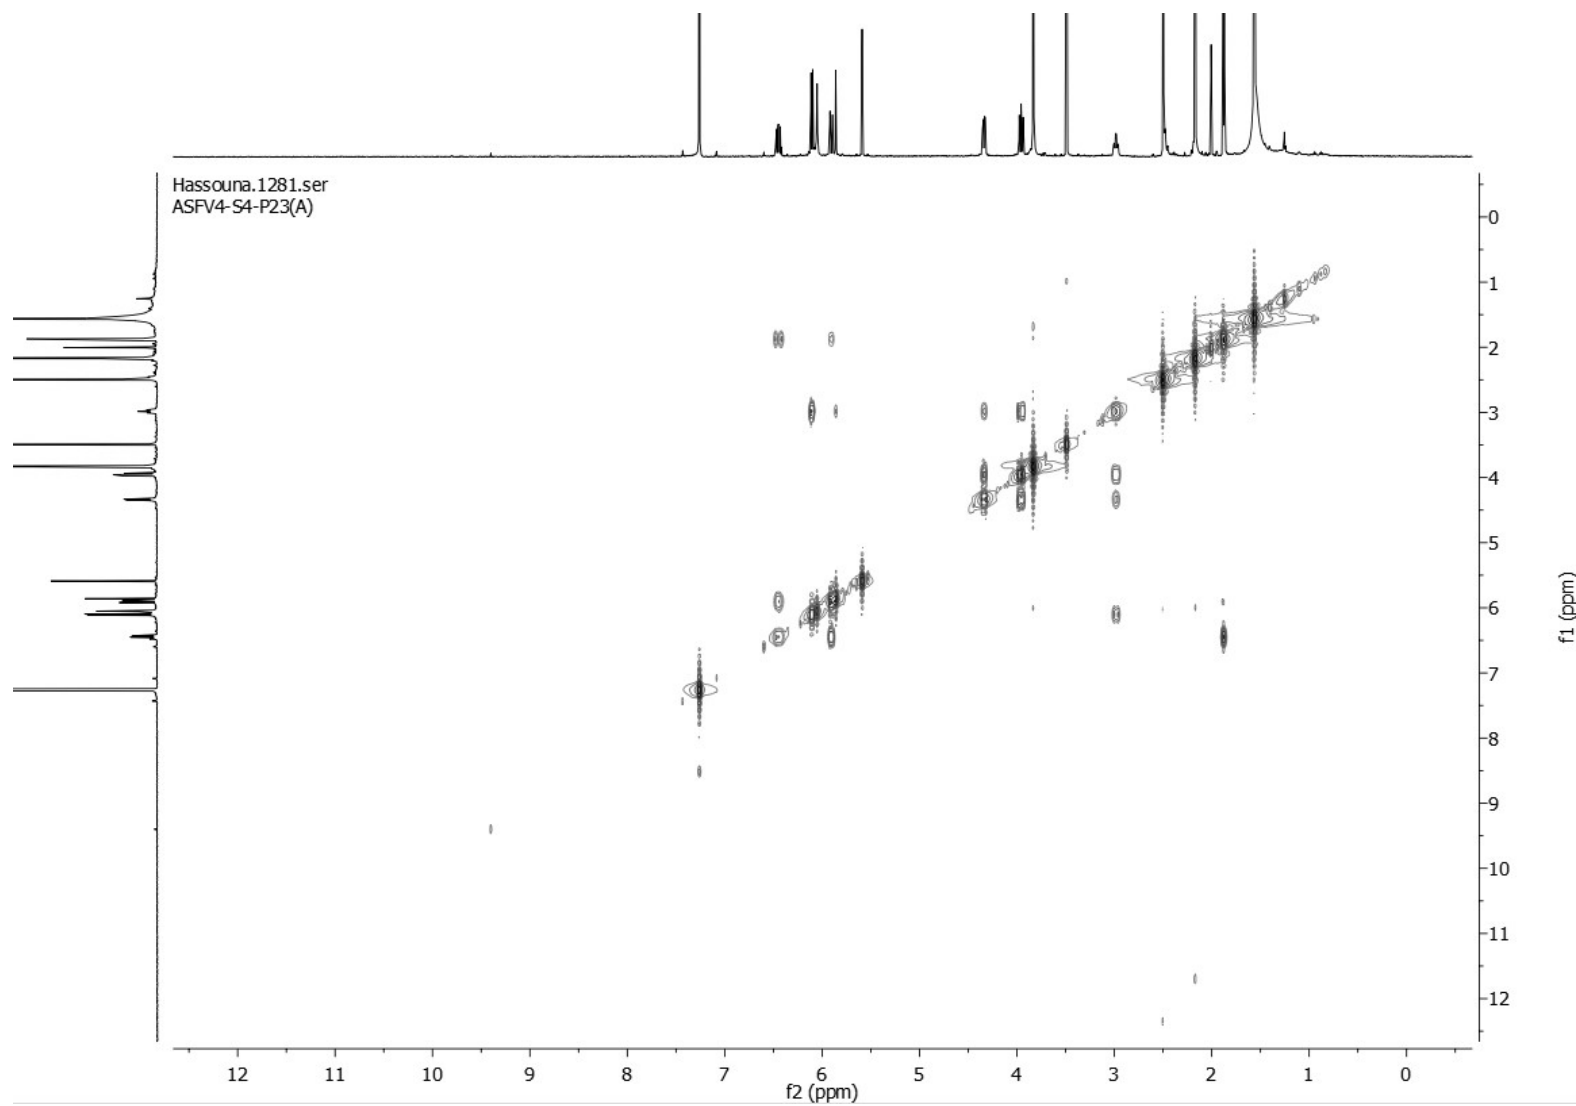

Figure S5. HSQC (600 MHz/150 MHz, CDCl<sub>3</sub>) spectrum of compound **1**.

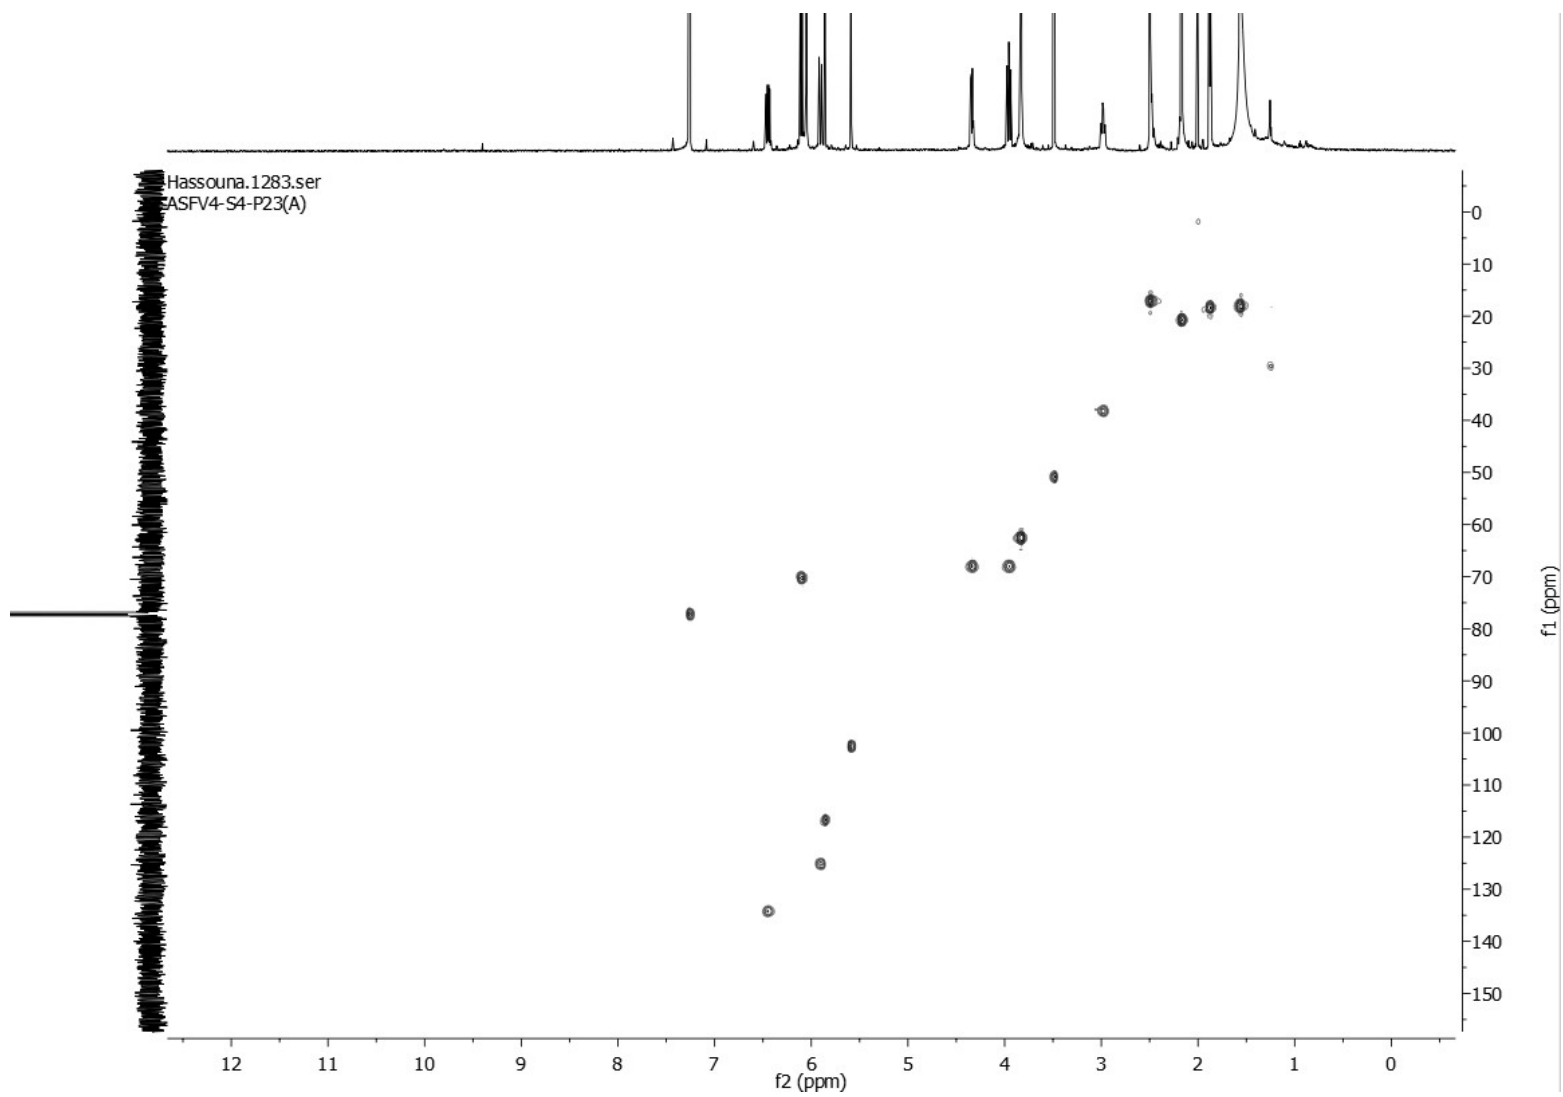

Figure S6. HMBC (600 MHz/150 MHz, CDCl<sub>3</sub>) spectrum of compound **1**.

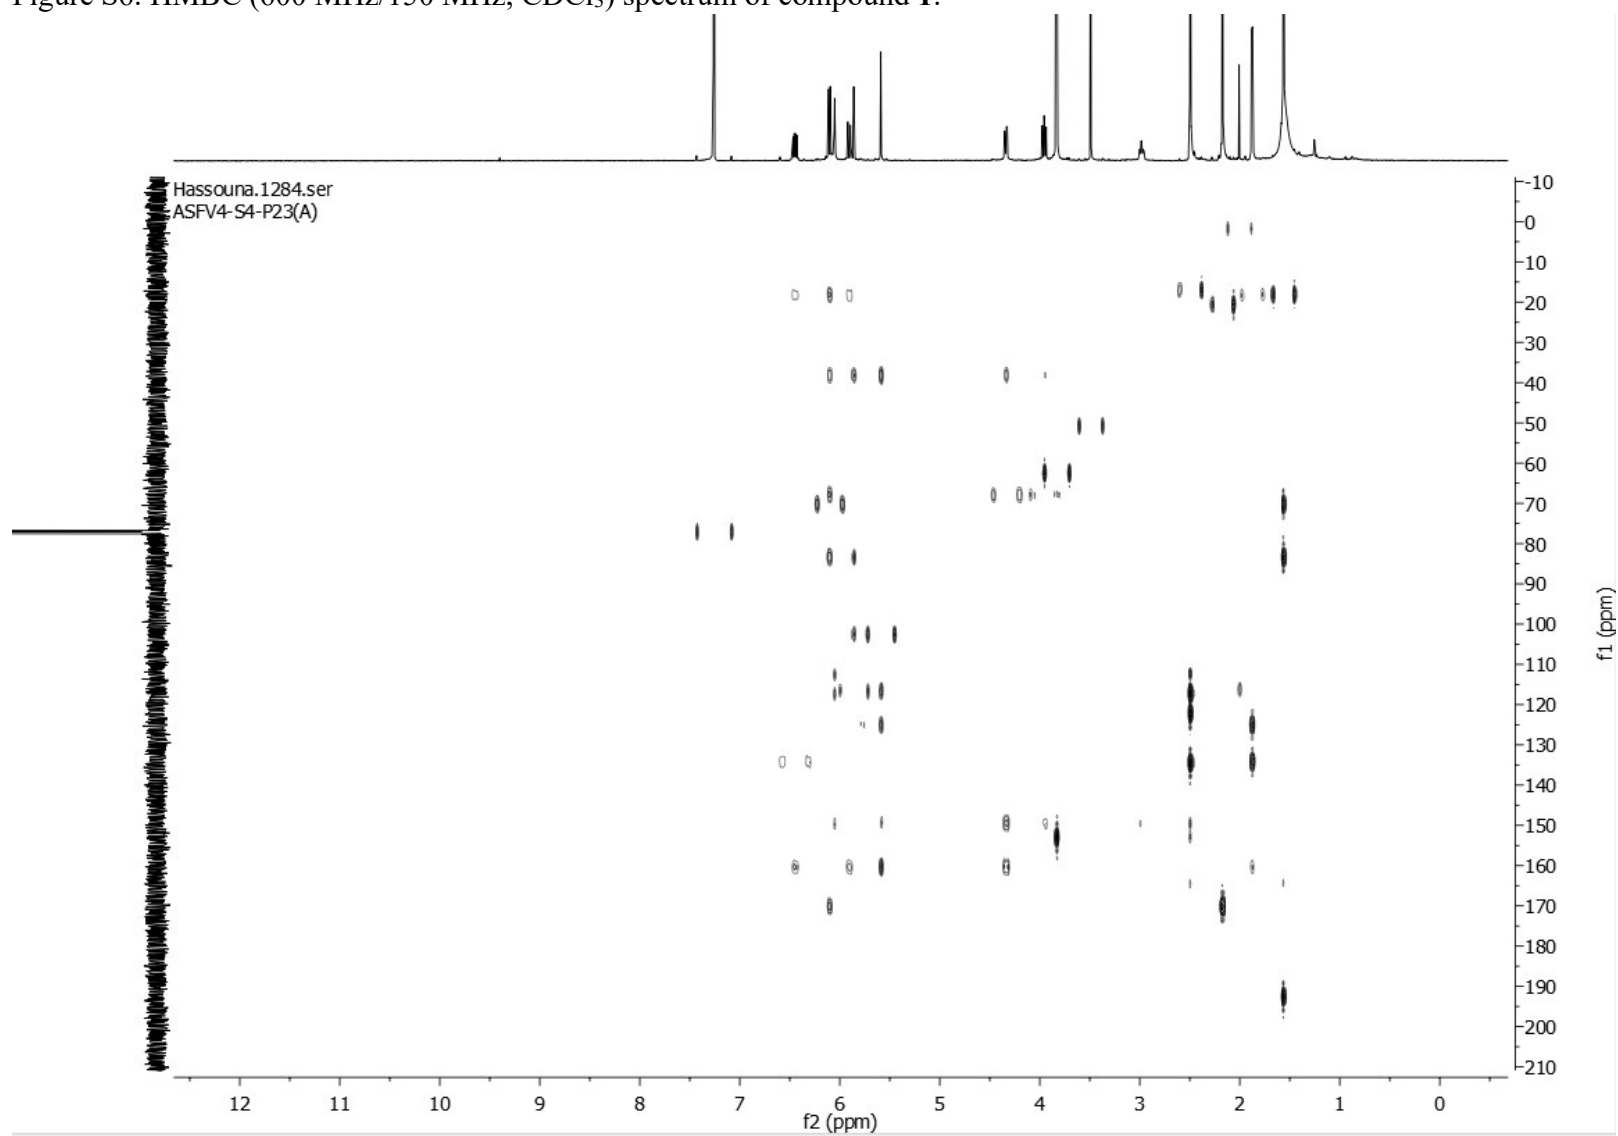



Figure S7. ROESY (600 MHz, CDCl<sub>3</sub>) spectrum of compound 1.

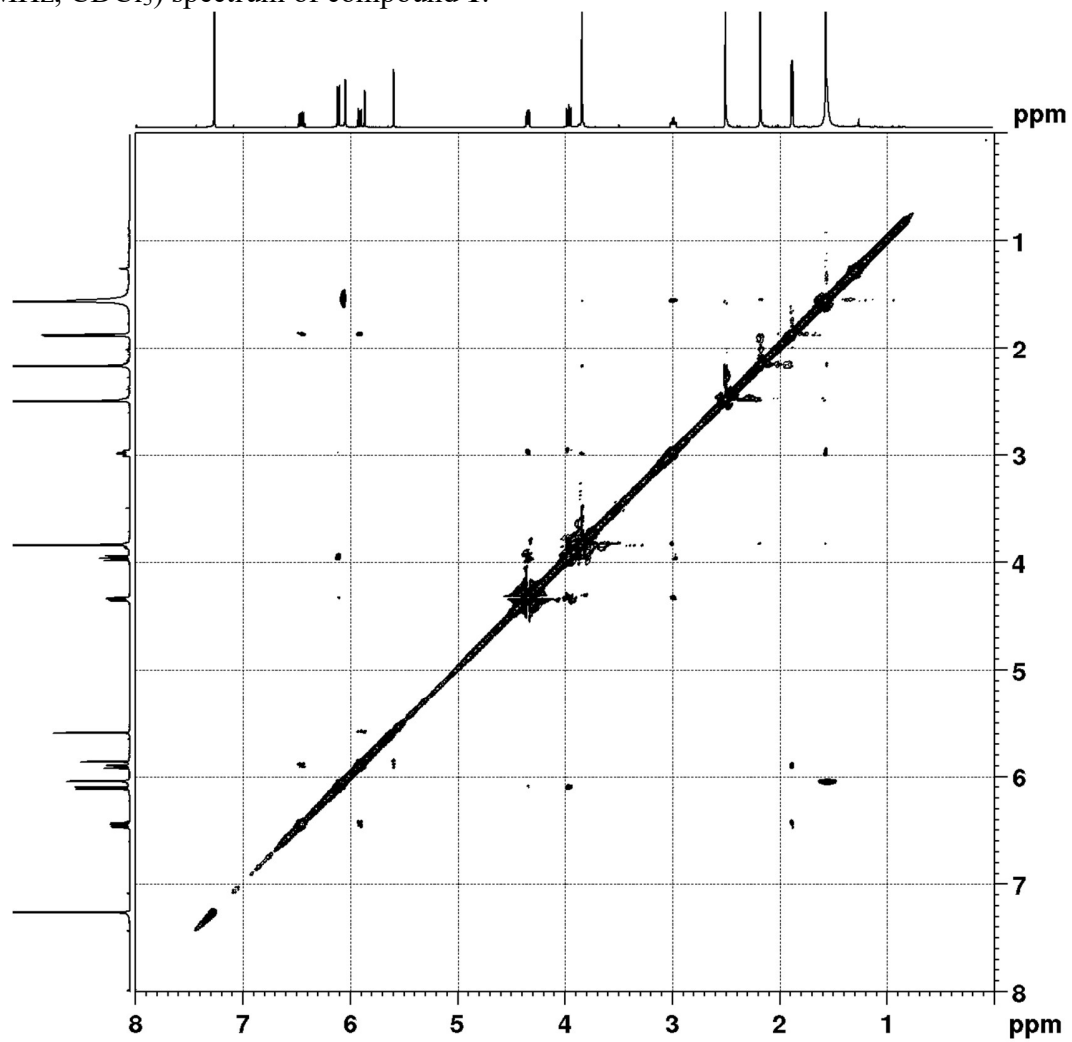

Figure S8. UV spectrum of compound 2.

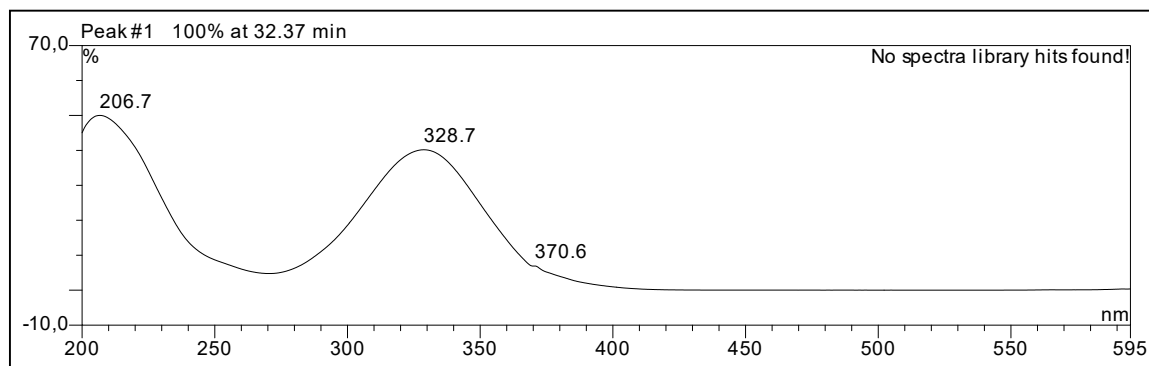

Figure S9. HRESIMS of compound 2.

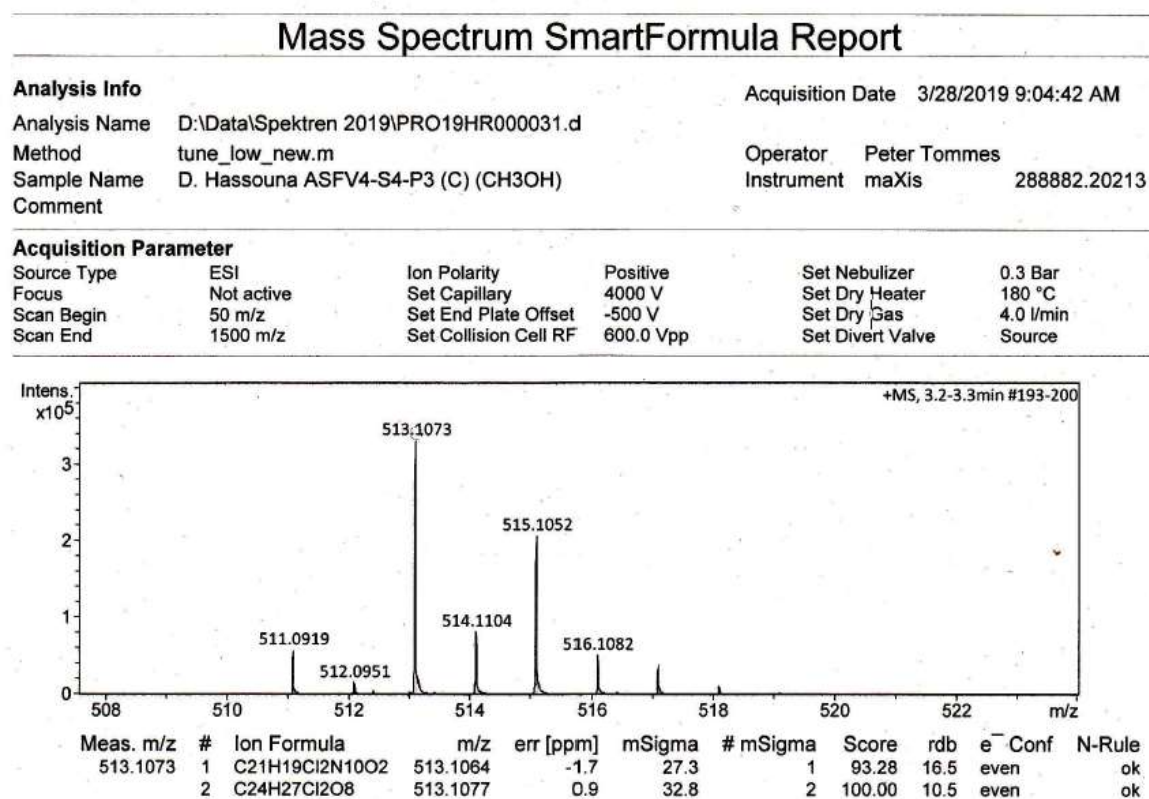

Figure S10.  $^1\text{H}$  NMR (600 MHz,  $\text{CDCl}_3$ ) spectrum of compound **2**.

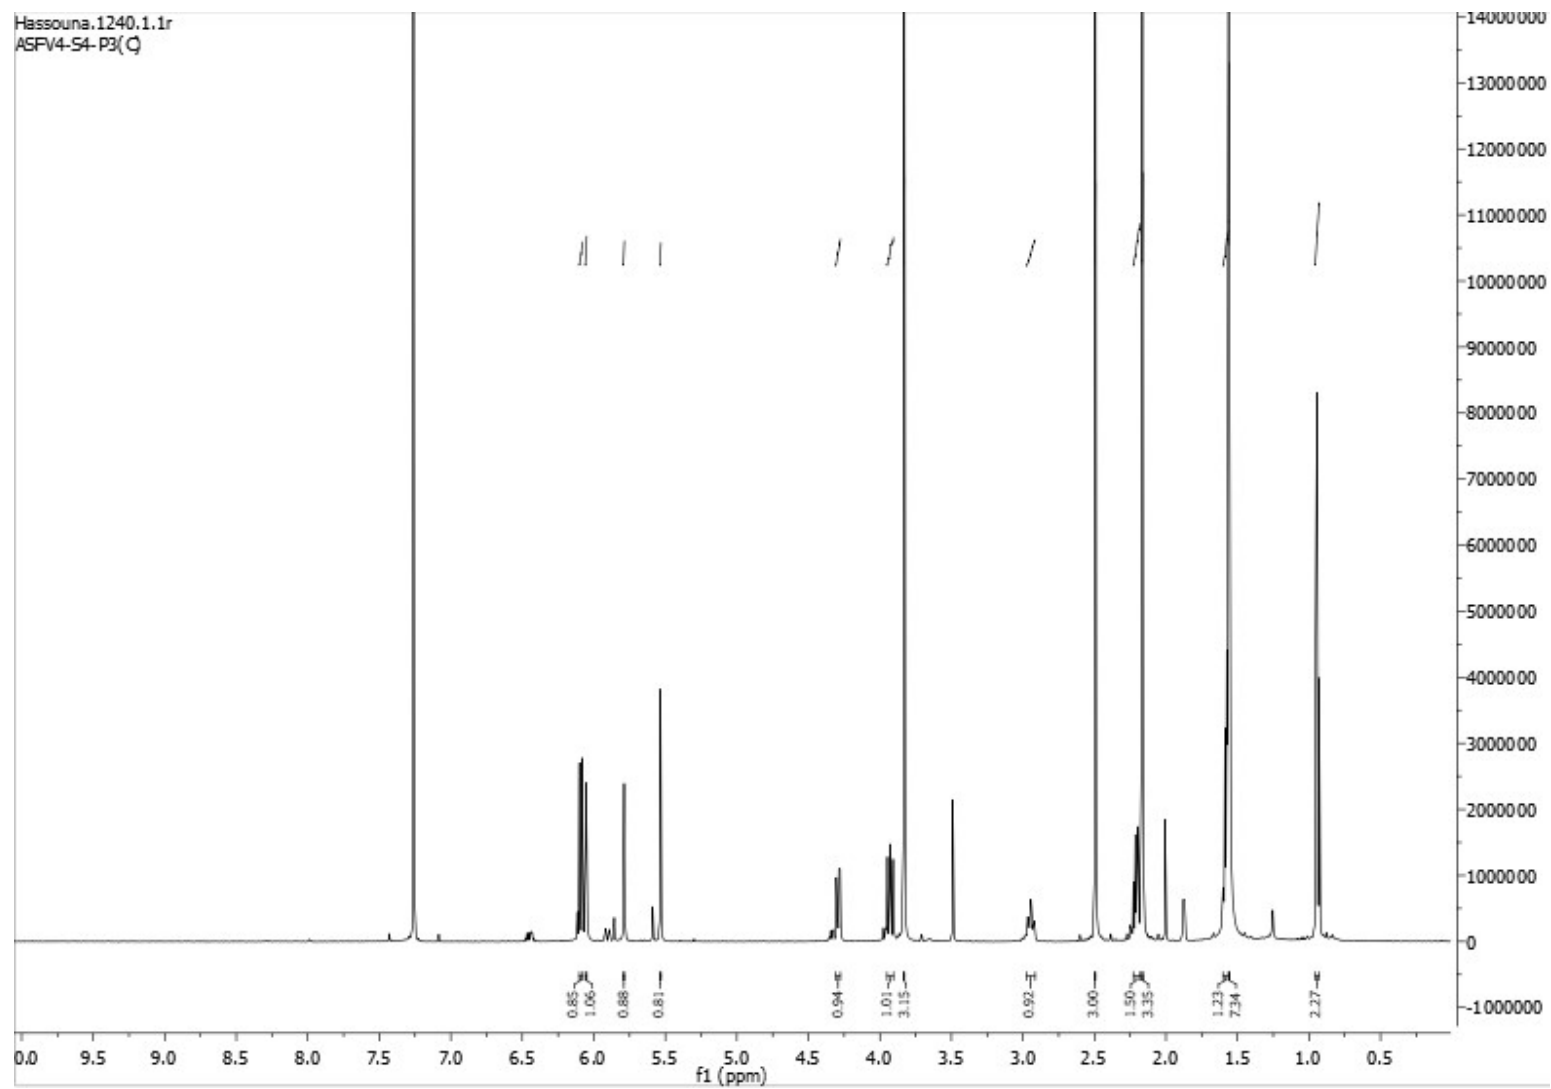

Figure S11. COSY (600 MHz, CDCl<sub>3</sub>) spectrum of compound 2.

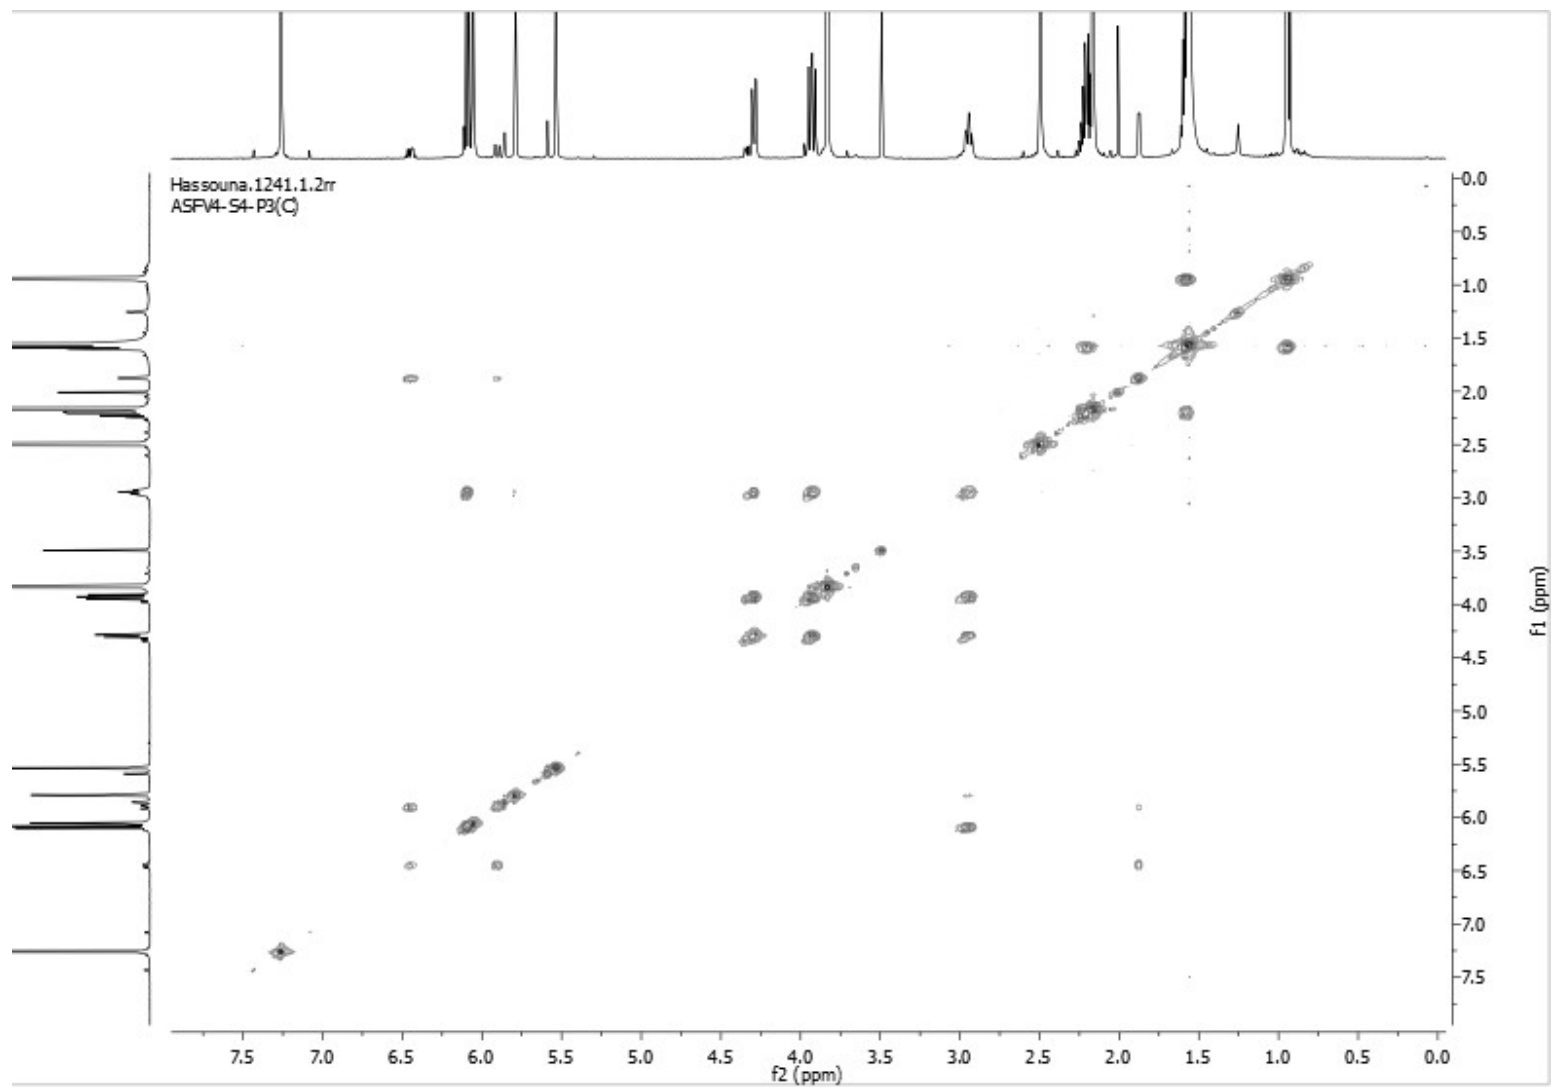

Figure S12. HSQC (600 MHz/150 MHz, CDCl<sub>3</sub>) spectrum of compound 2.

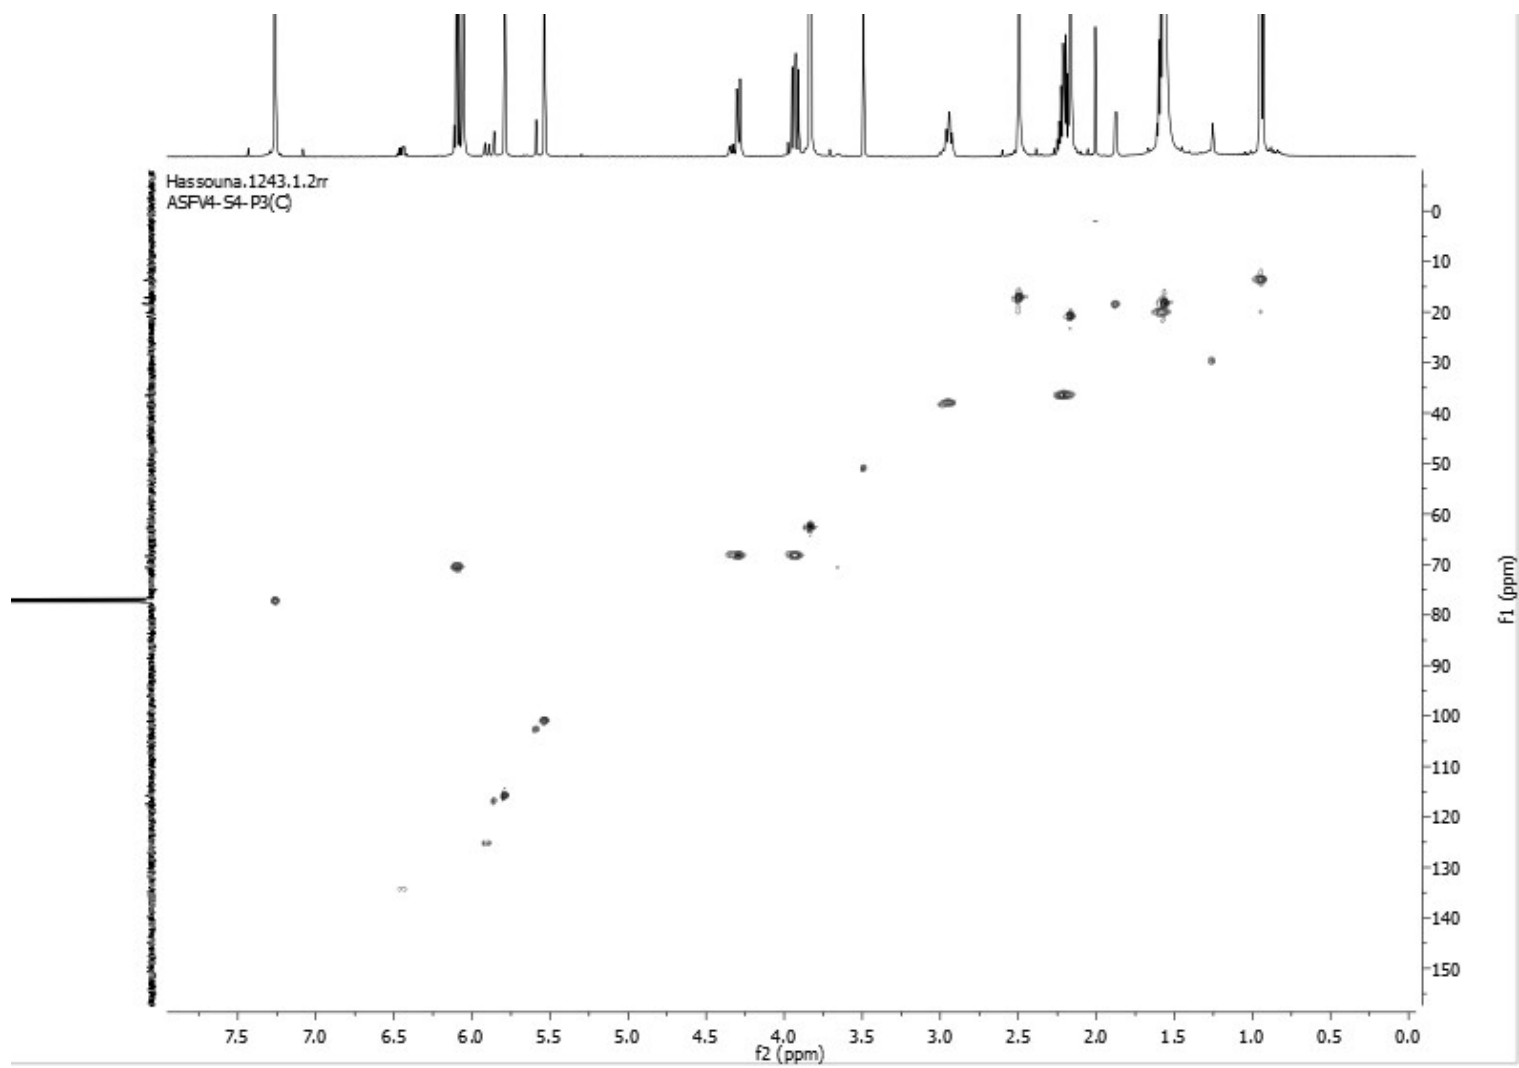

Figure S13. HMBC (600 MHz/150 MHz, CDCl<sub>3</sub>) spectrum of compound **2**.

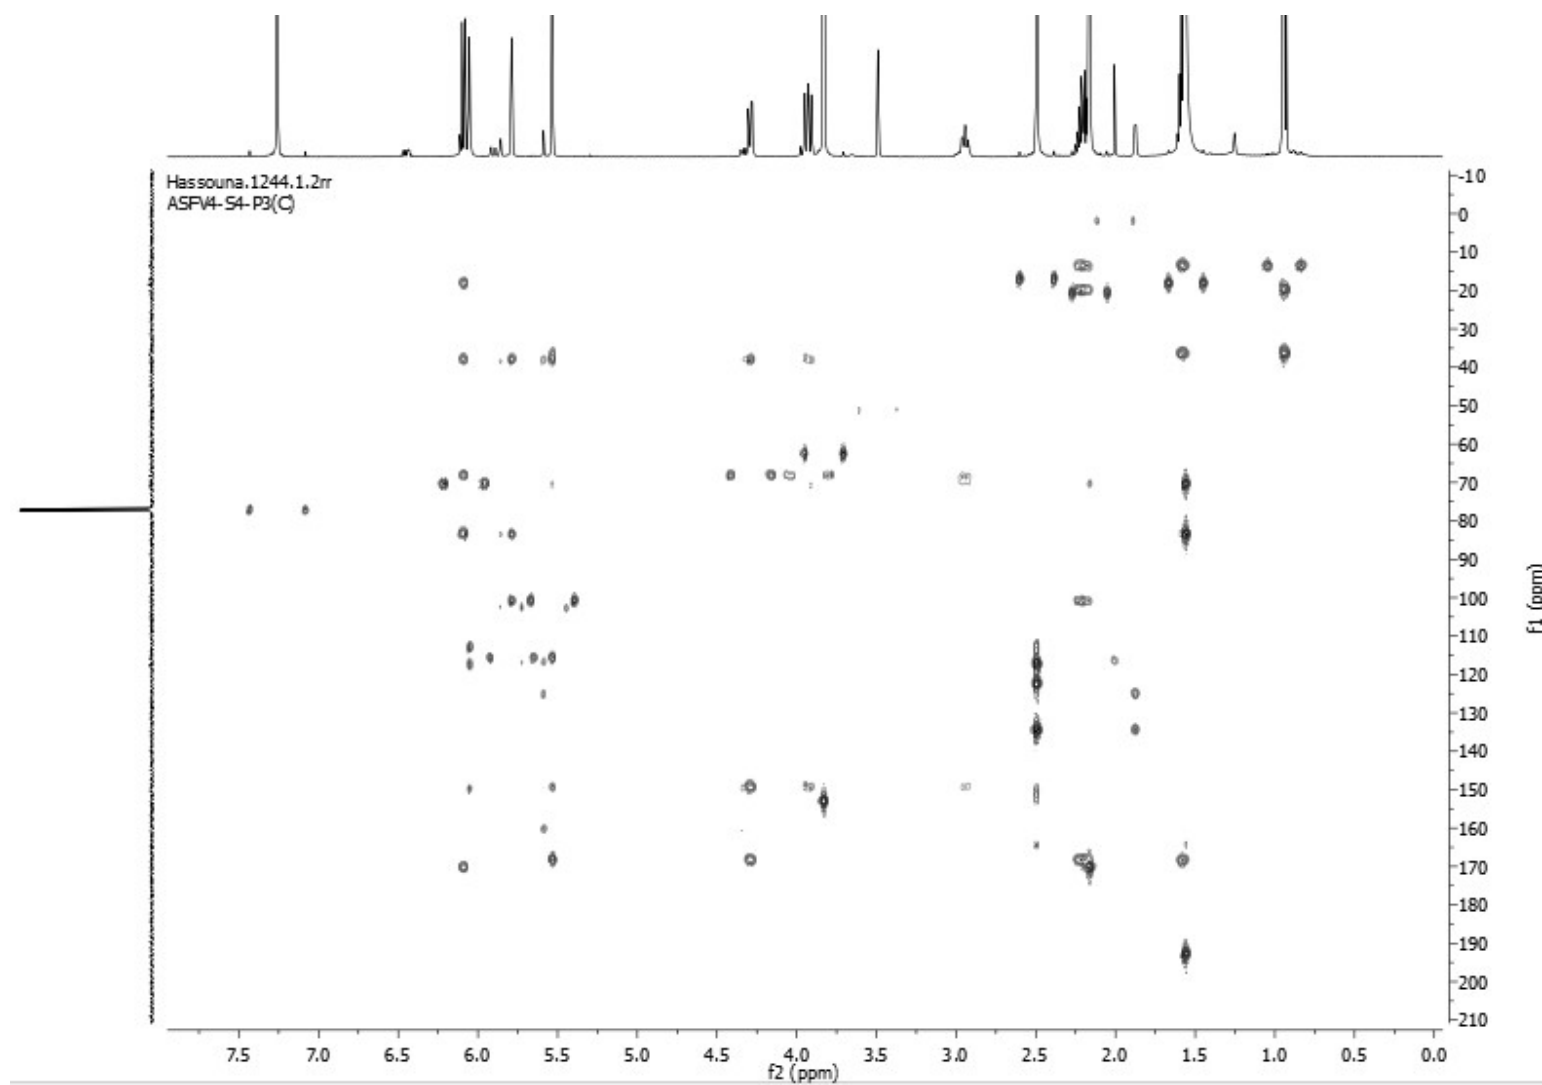

Figure S14. ROESY (600 MHz, CDCl<sub>3</sub>) spectrum of compound **2**.

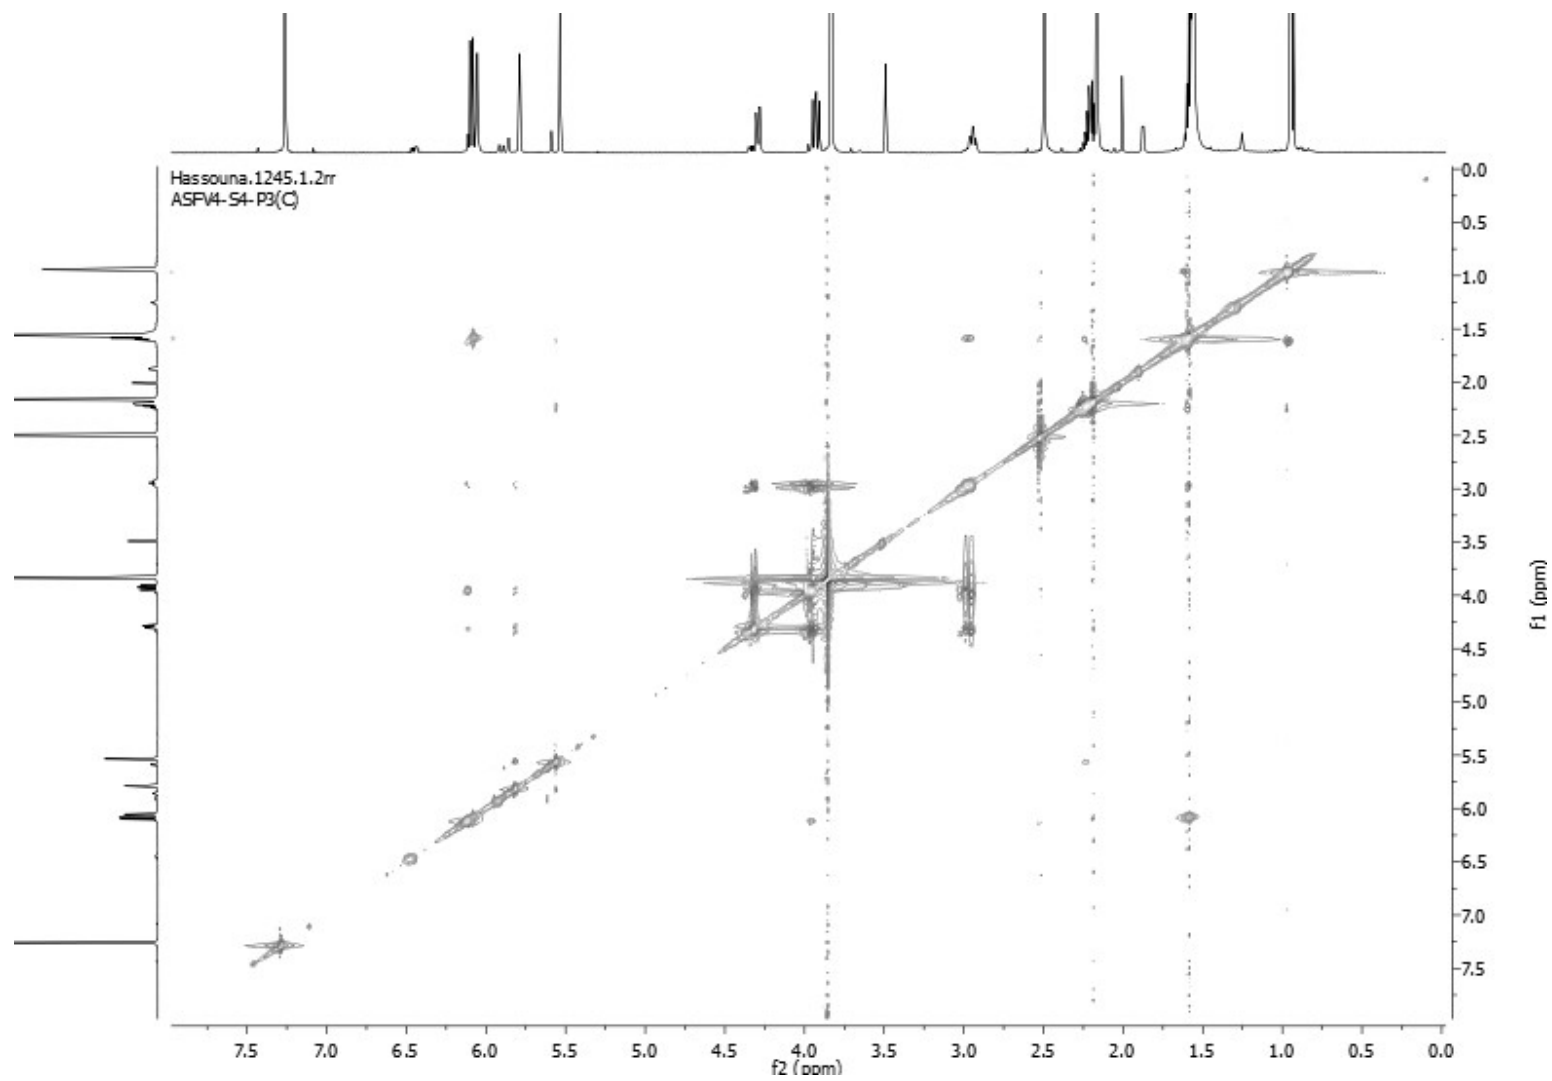

Figure S15. UV spectrum of compound 7.

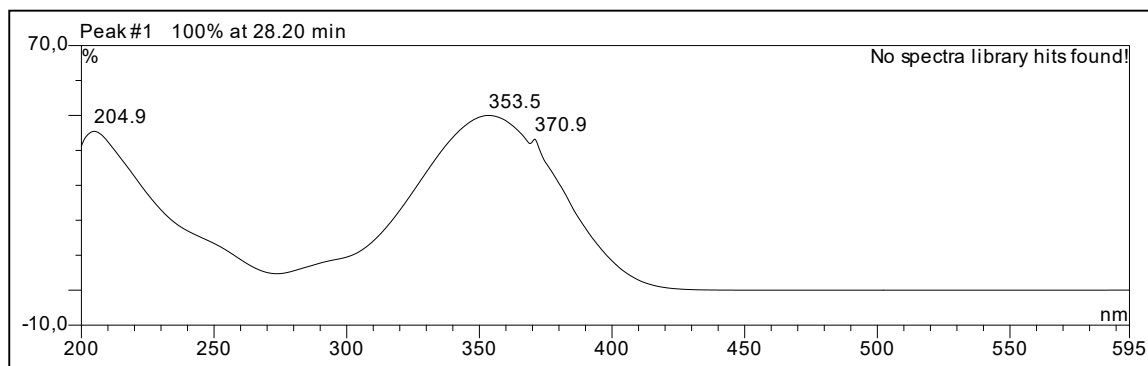

Figure S16. HRESIMS of compound 7.

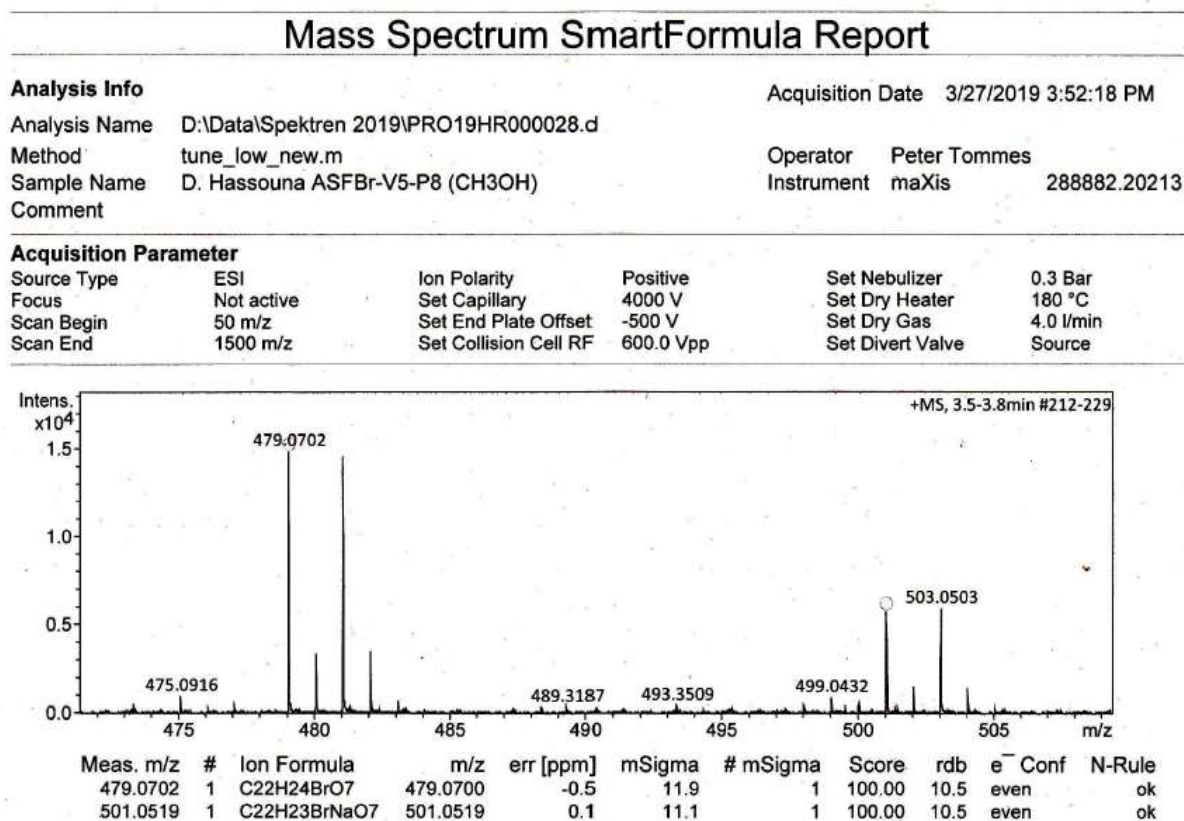



Figure S17.  $^1\text{H}$  NMR (700 MHz,  $\text{CDCl}_3$ ) spectrum of compound 7.

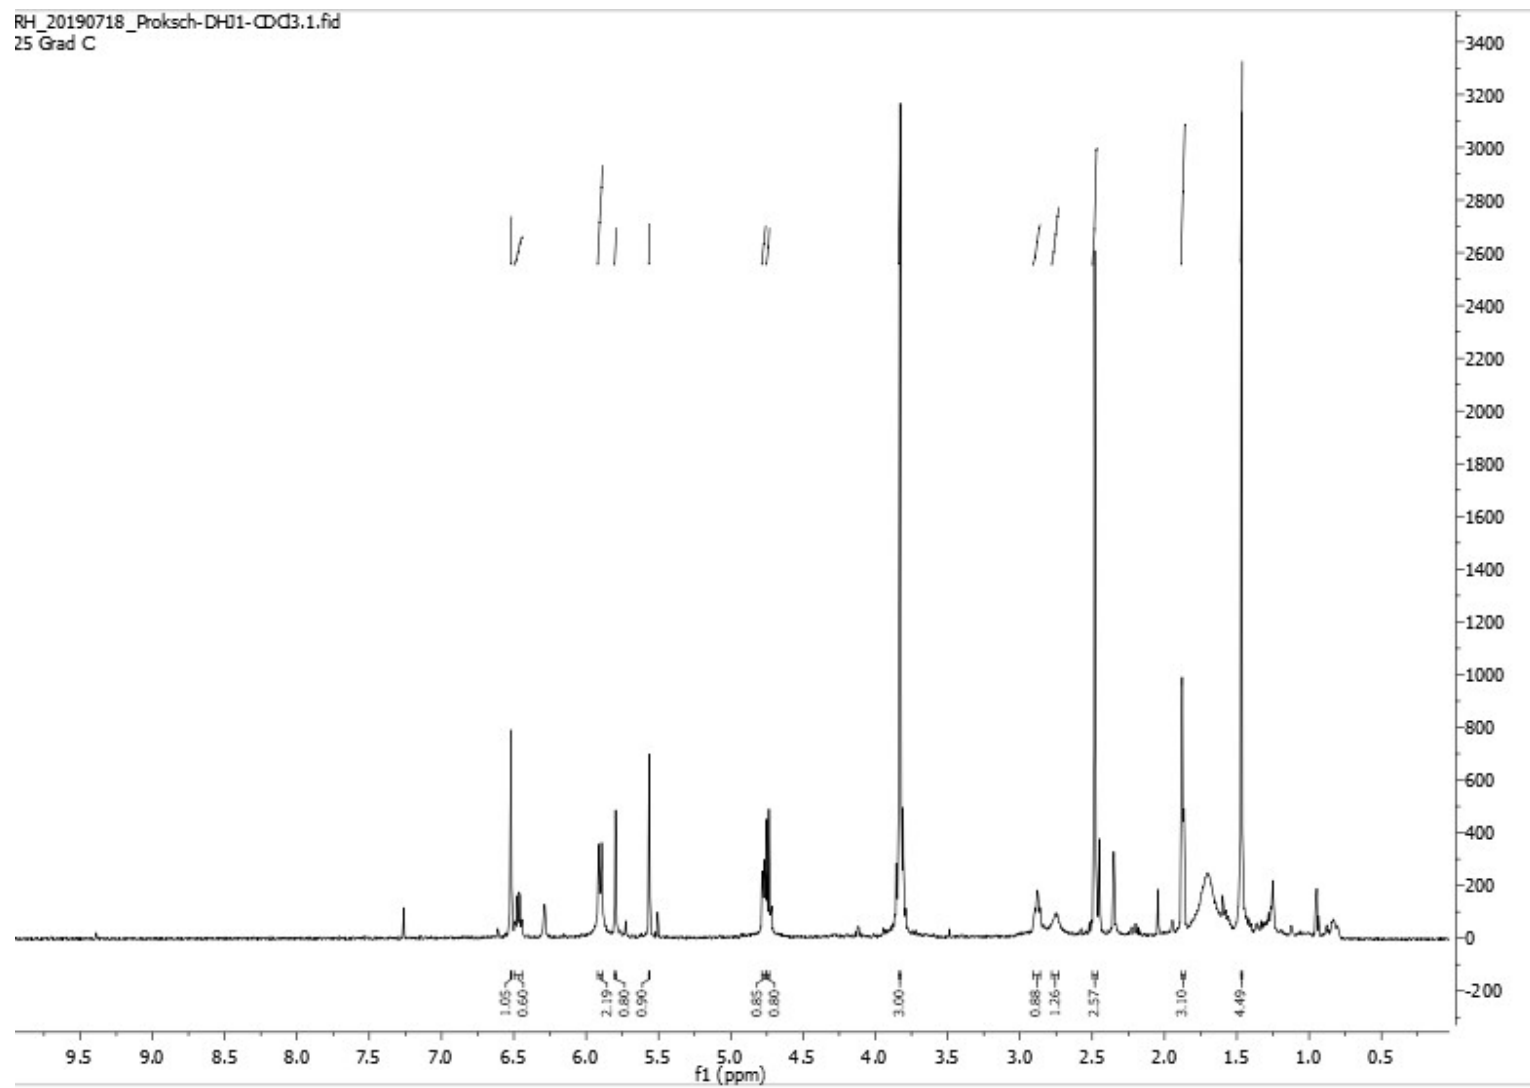

Figure S18.  $^{13}\text{C}$  NMR (175 MHz,  $\text{CDCl}_3$ ) spectrum of compound 7.

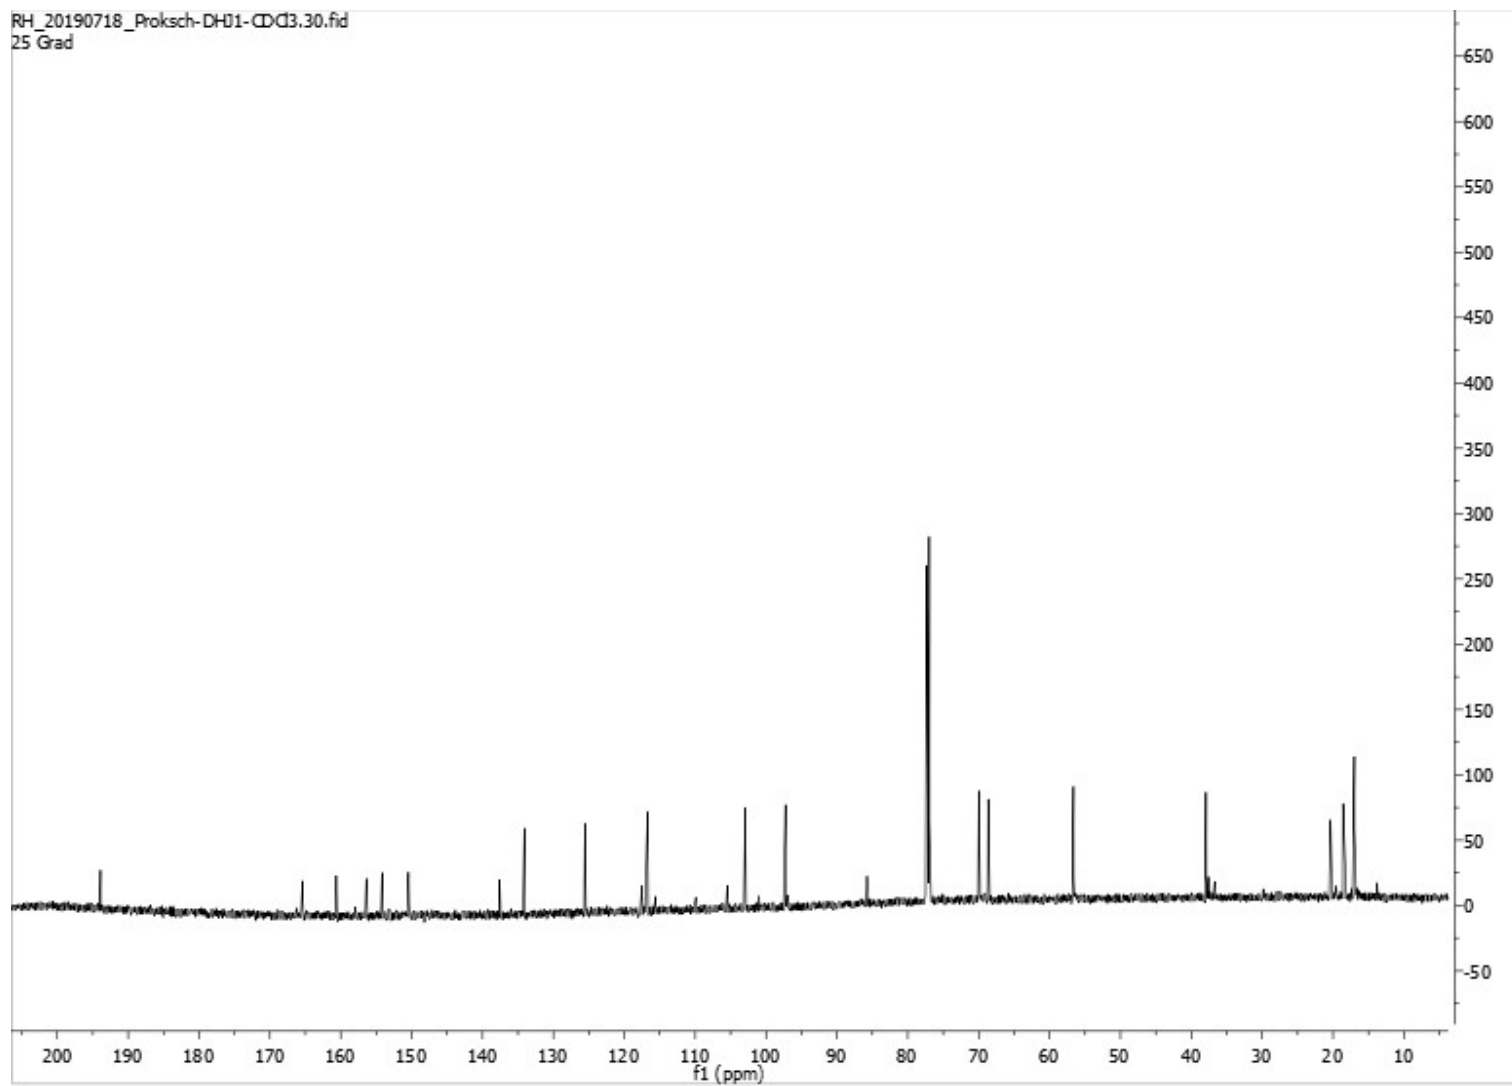

Figure S19. COSY (700 MHz, CDCl<sub>3</sub>) spectrum of compound 7.

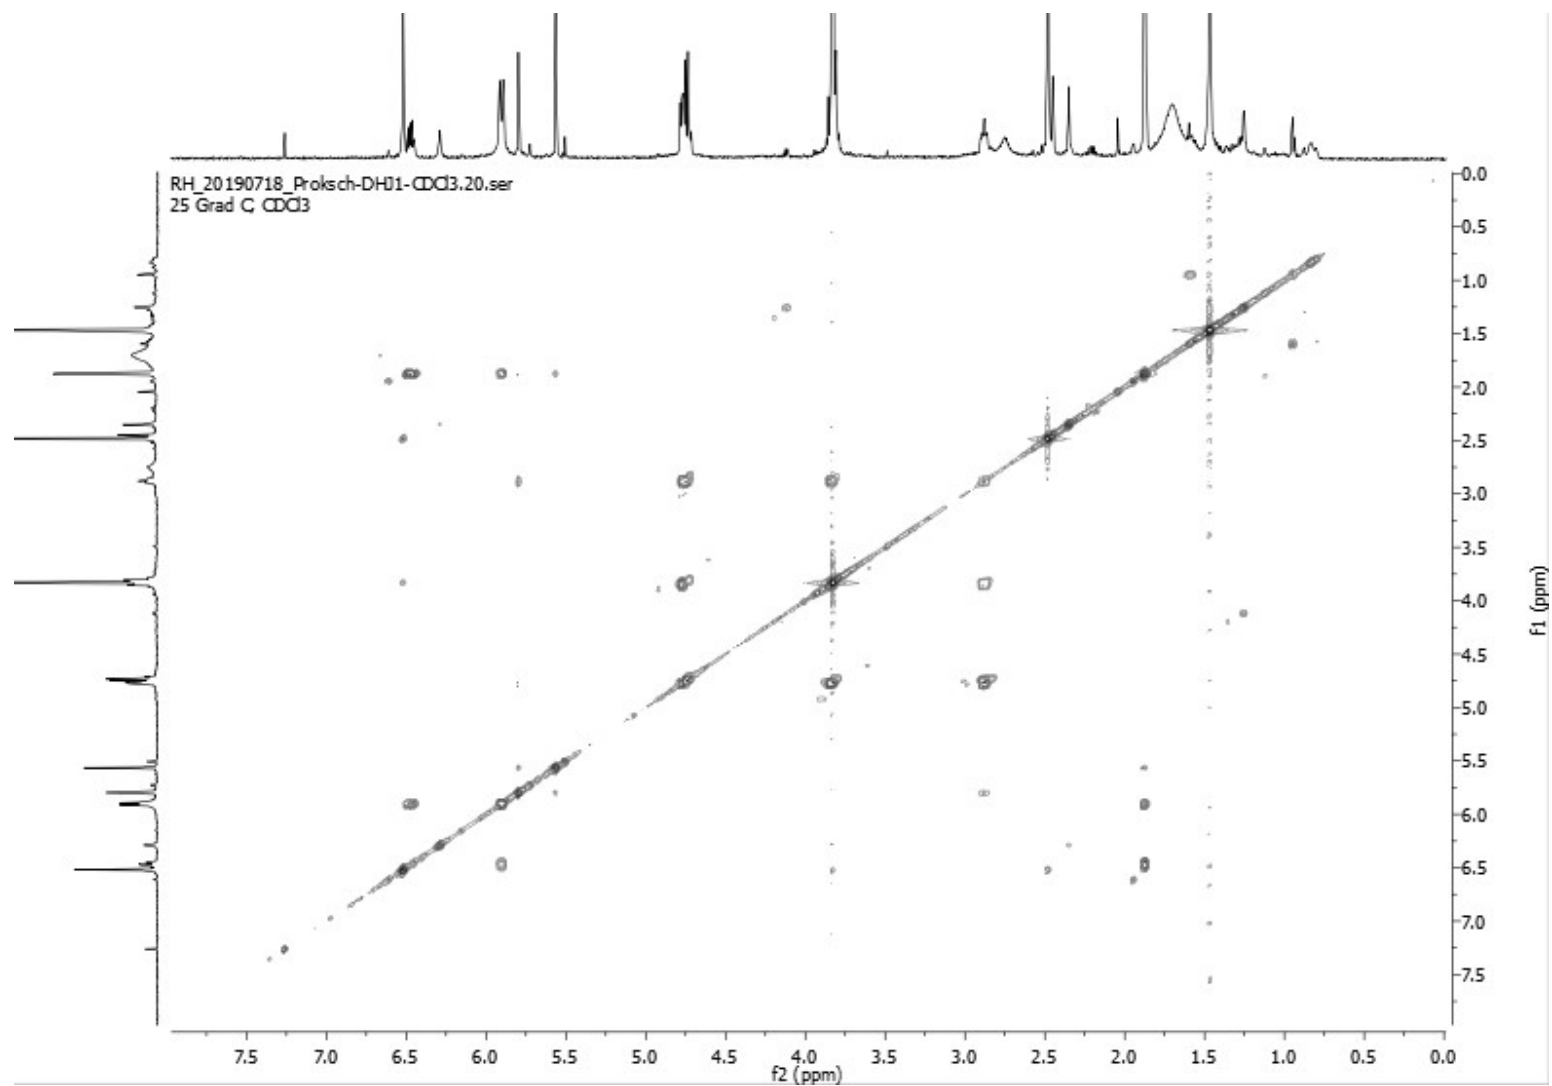

Figure S20. HSQC (700 MHz/175 MHz, CDCl<sub>3</sub>) spectrum of compound 7.

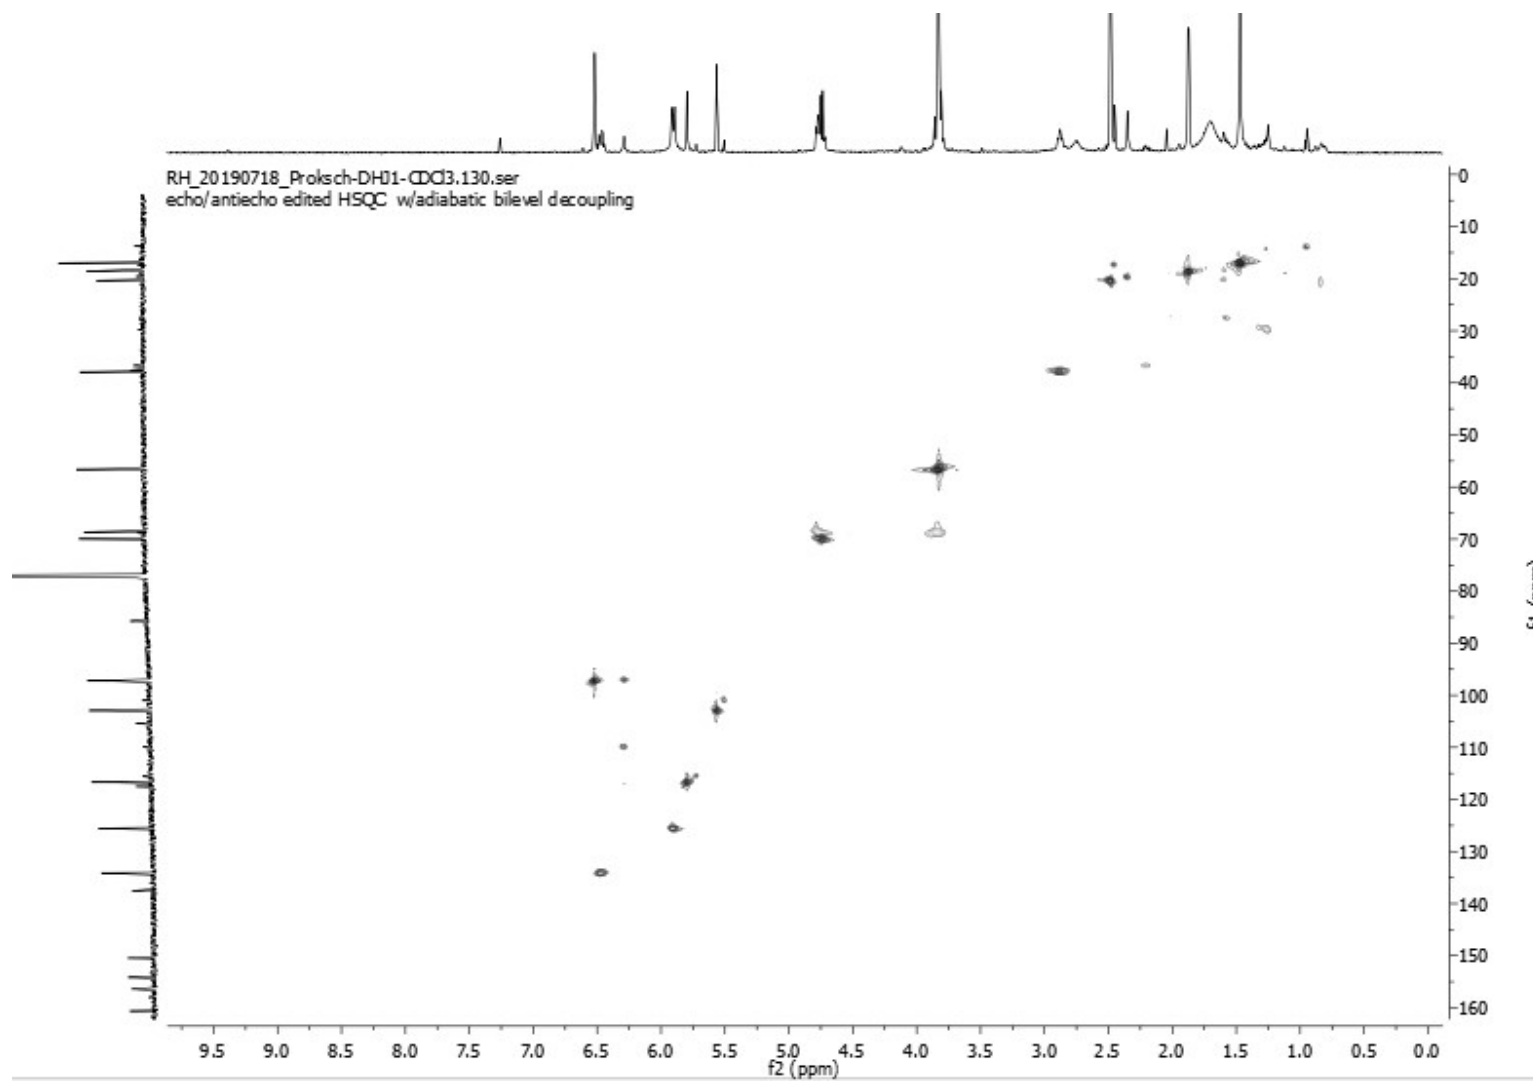

Figure S21. HMBC (700 MHz/175 MHz, CDCl<sub>3</sub>) spectrum of compound 7.

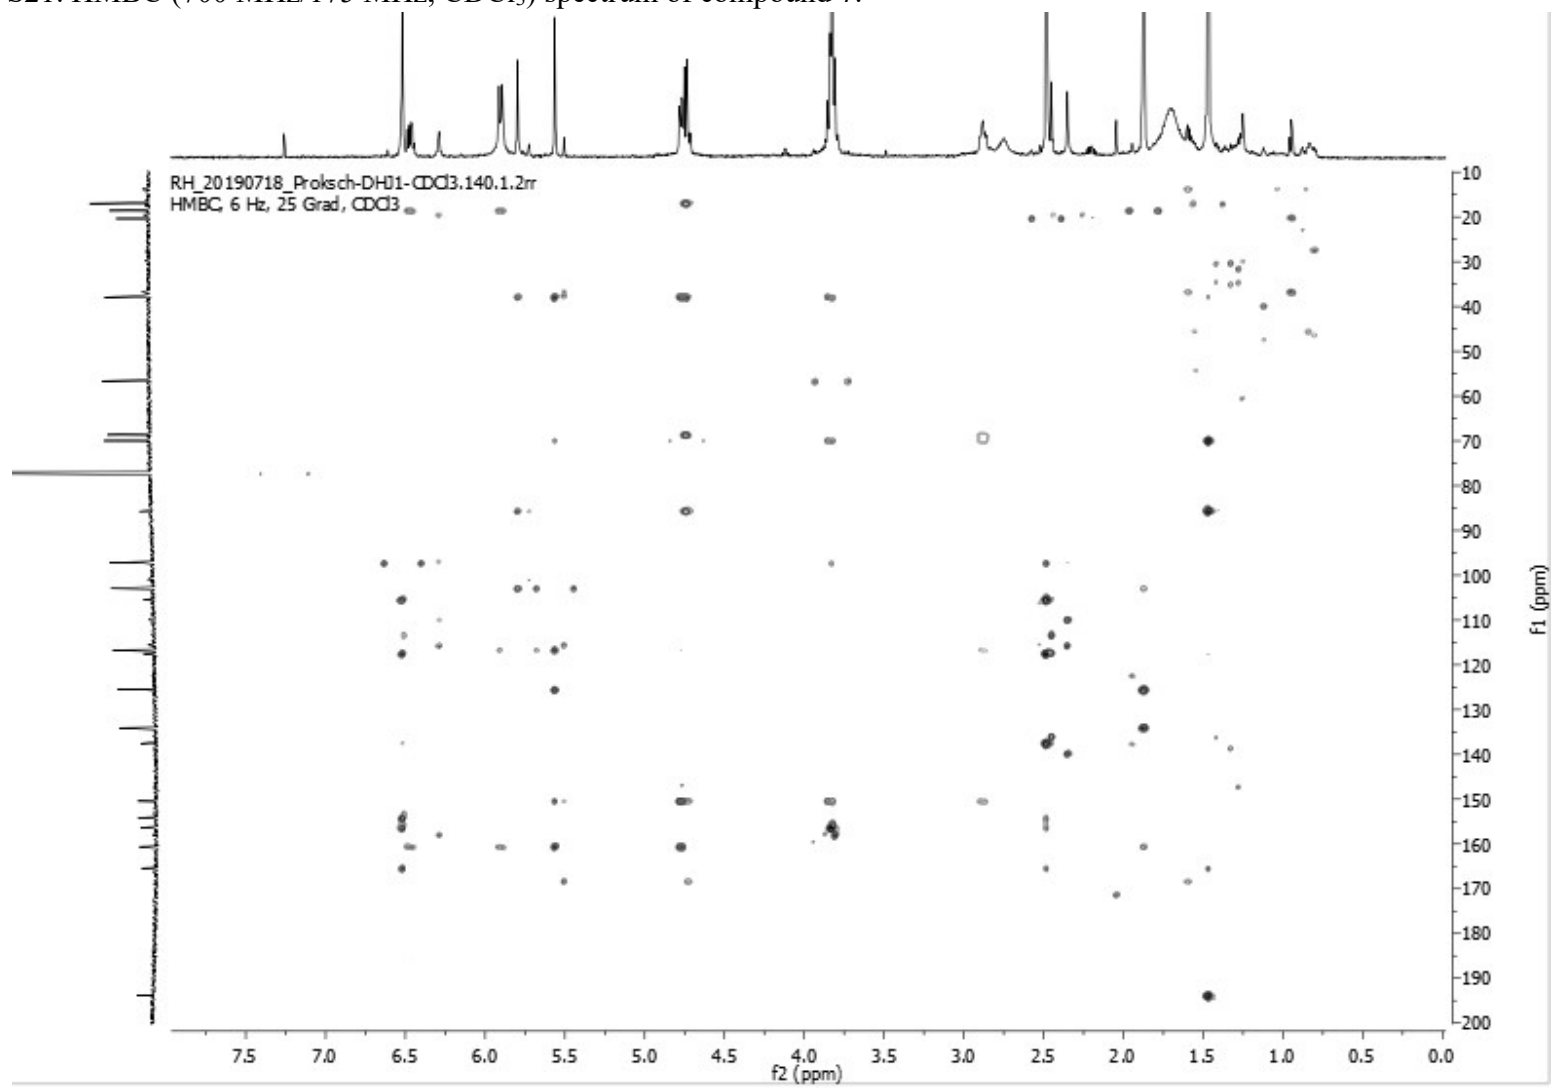

Figure S22. ROESY (700 MHz/175 MHz, CDCl<sub>3</sub>) spectrum of compound 7.

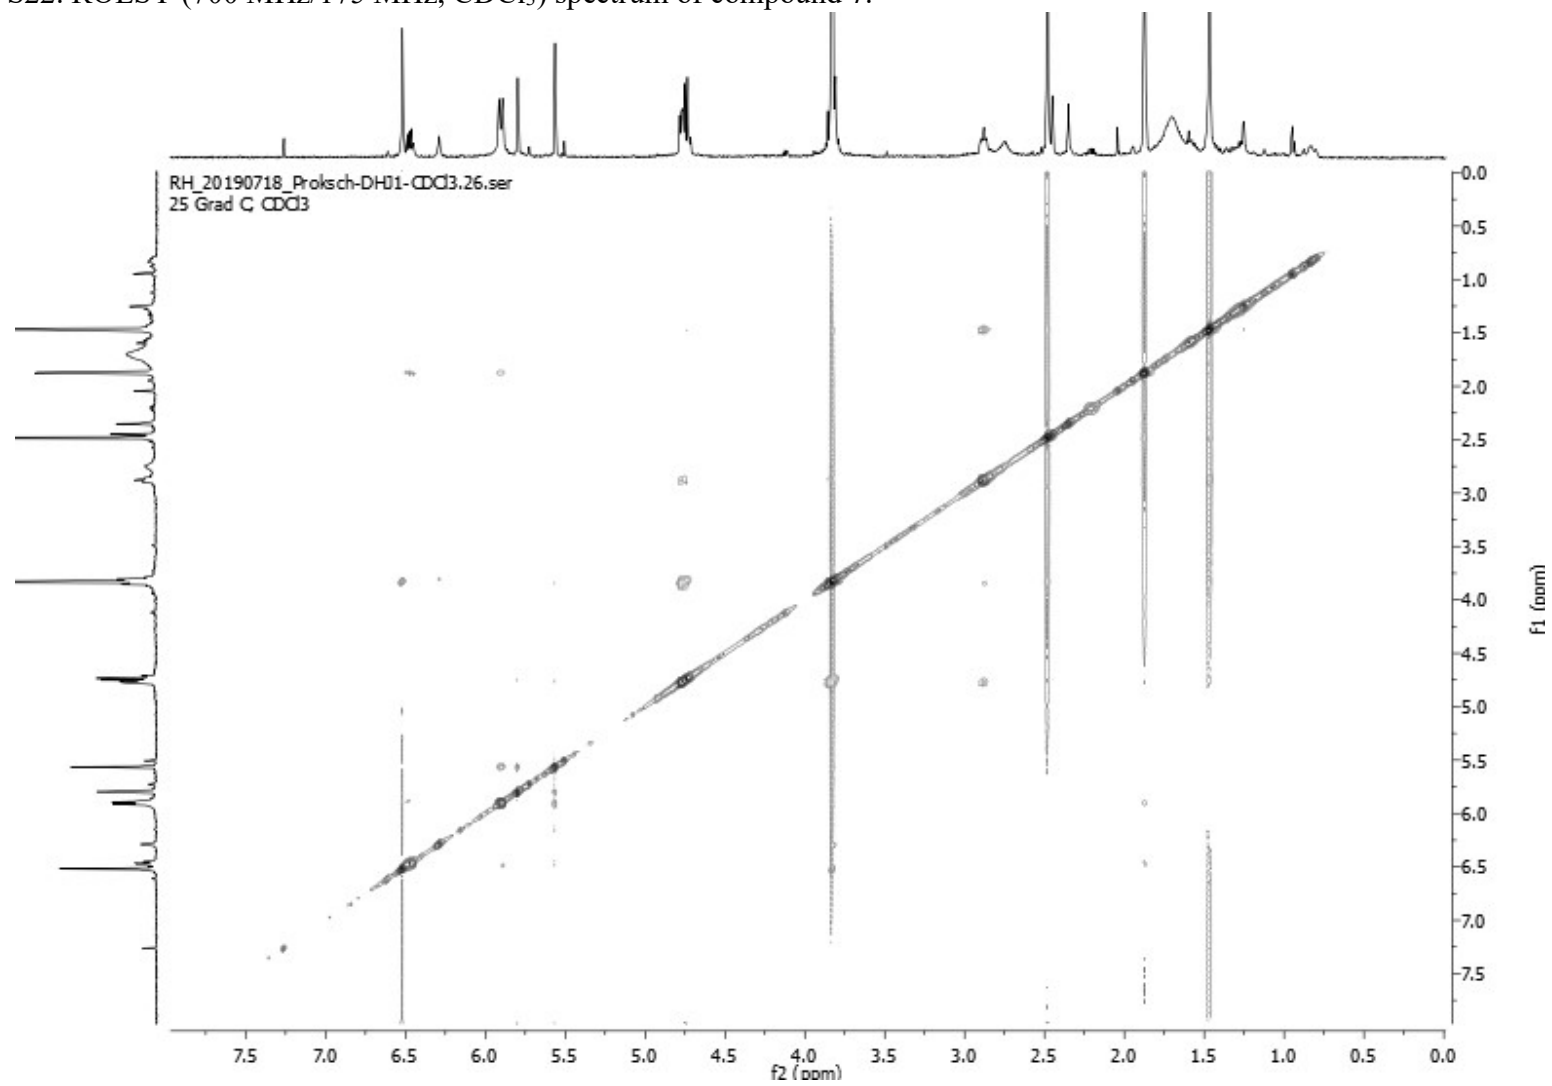

Figure S23. UV spectrum of compound **8**.

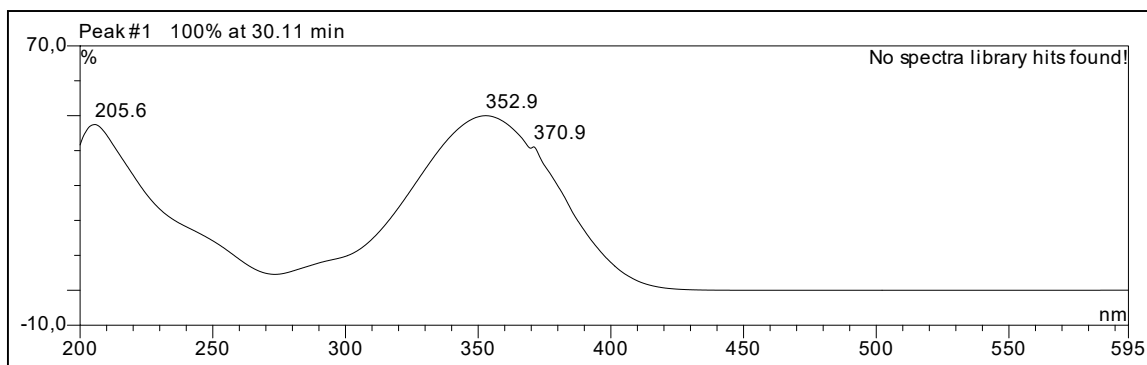

Figure S24. HRESIMS of compound **8**.

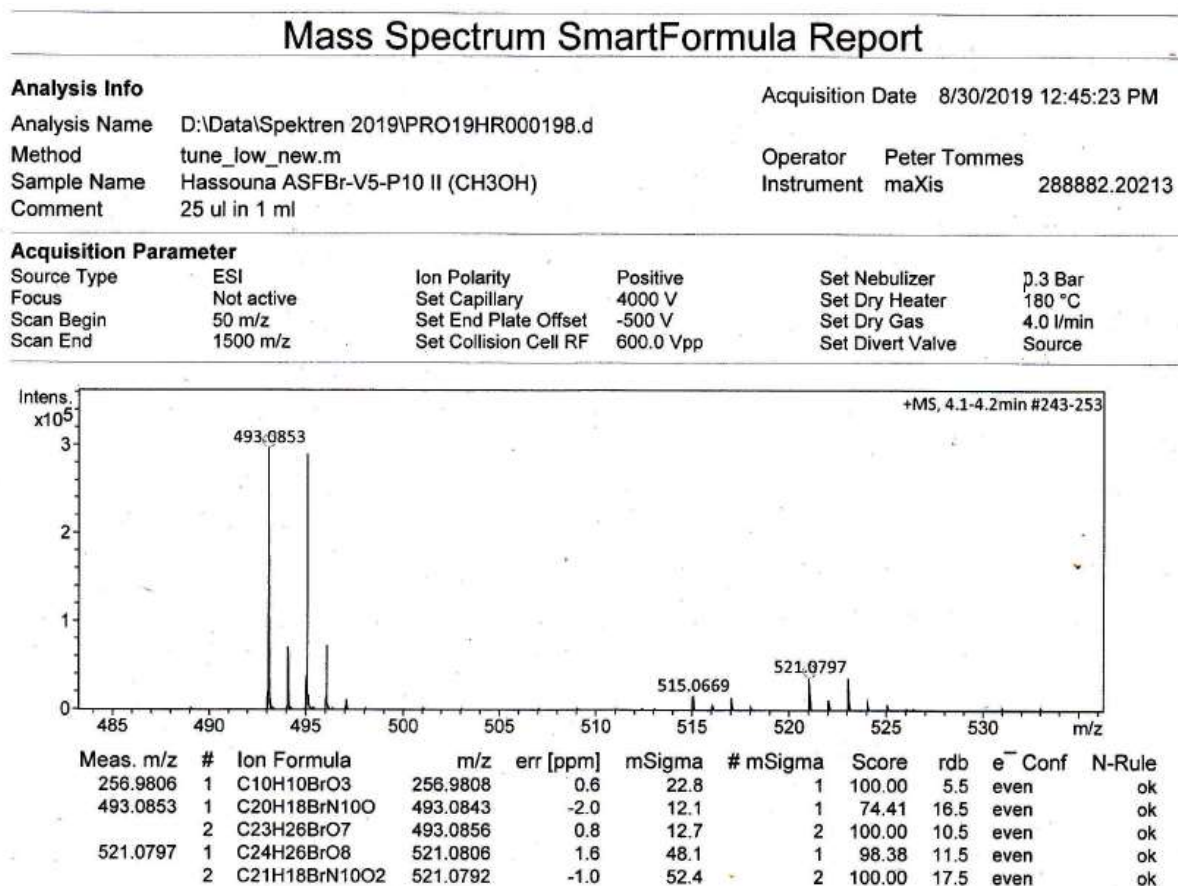

Figure S25.  $^1\text{H}$  NMR (600 MHz,  $\text{CDCl}_3$ ) spectrum of compound **8**.

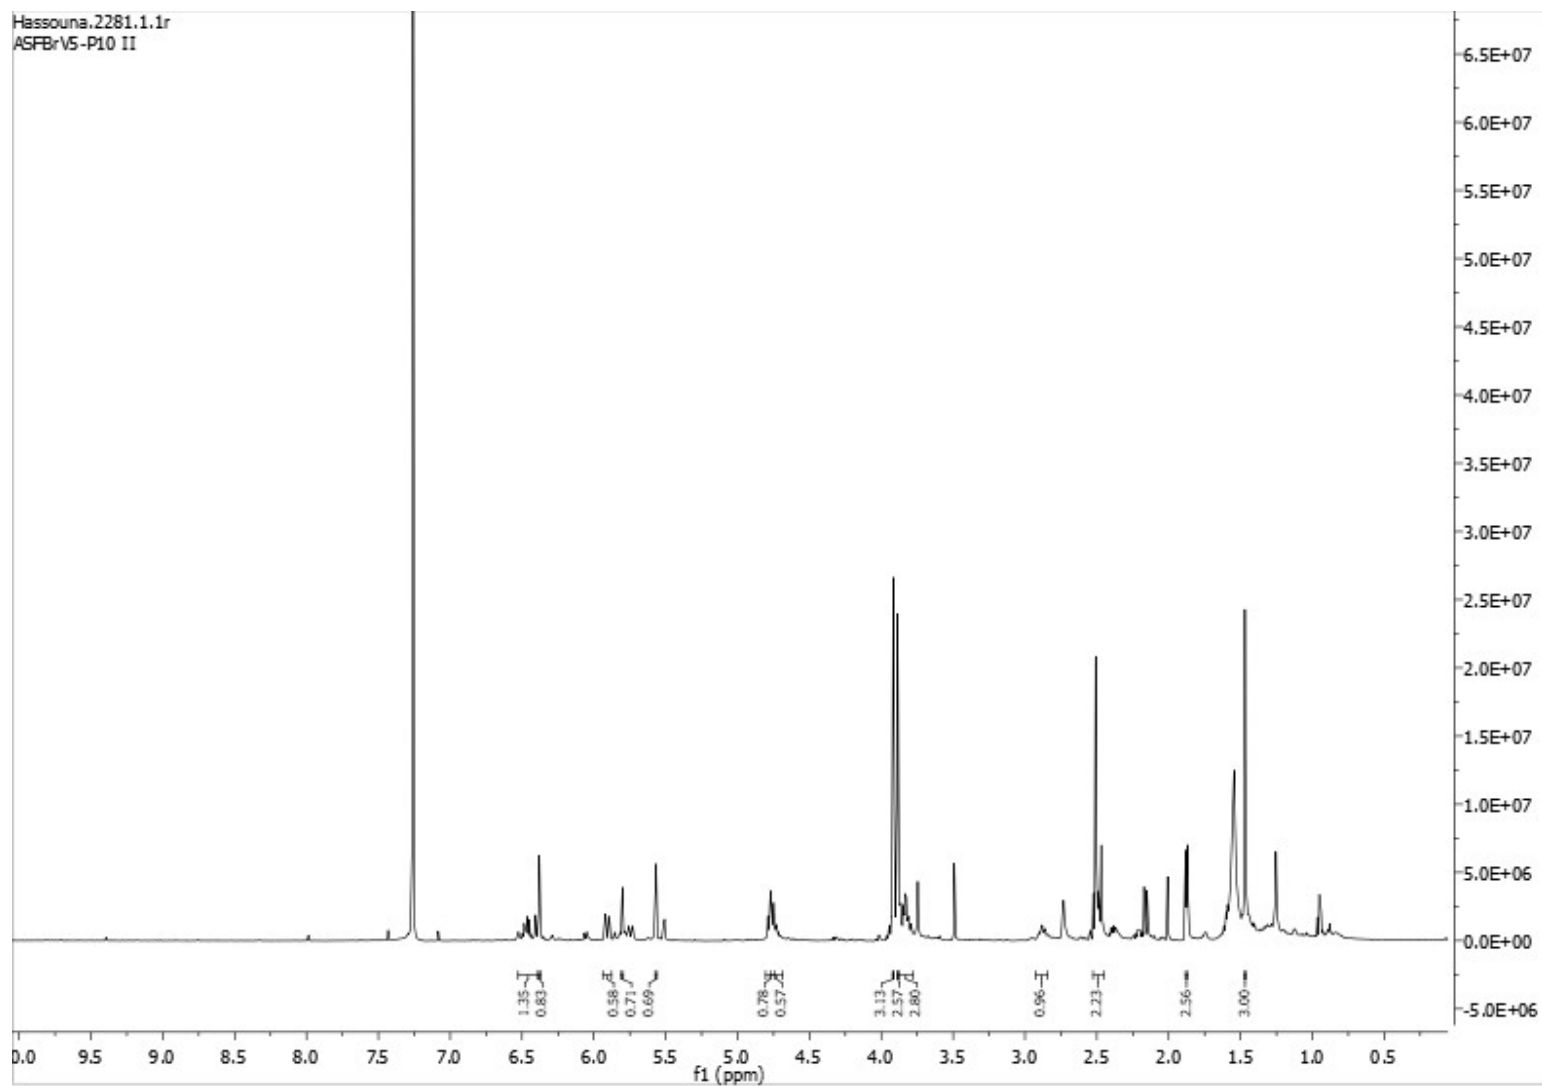



Figure S26. COSY (600 MHz, CDCl<sub>3</sub>) spectrum of compound **8**.

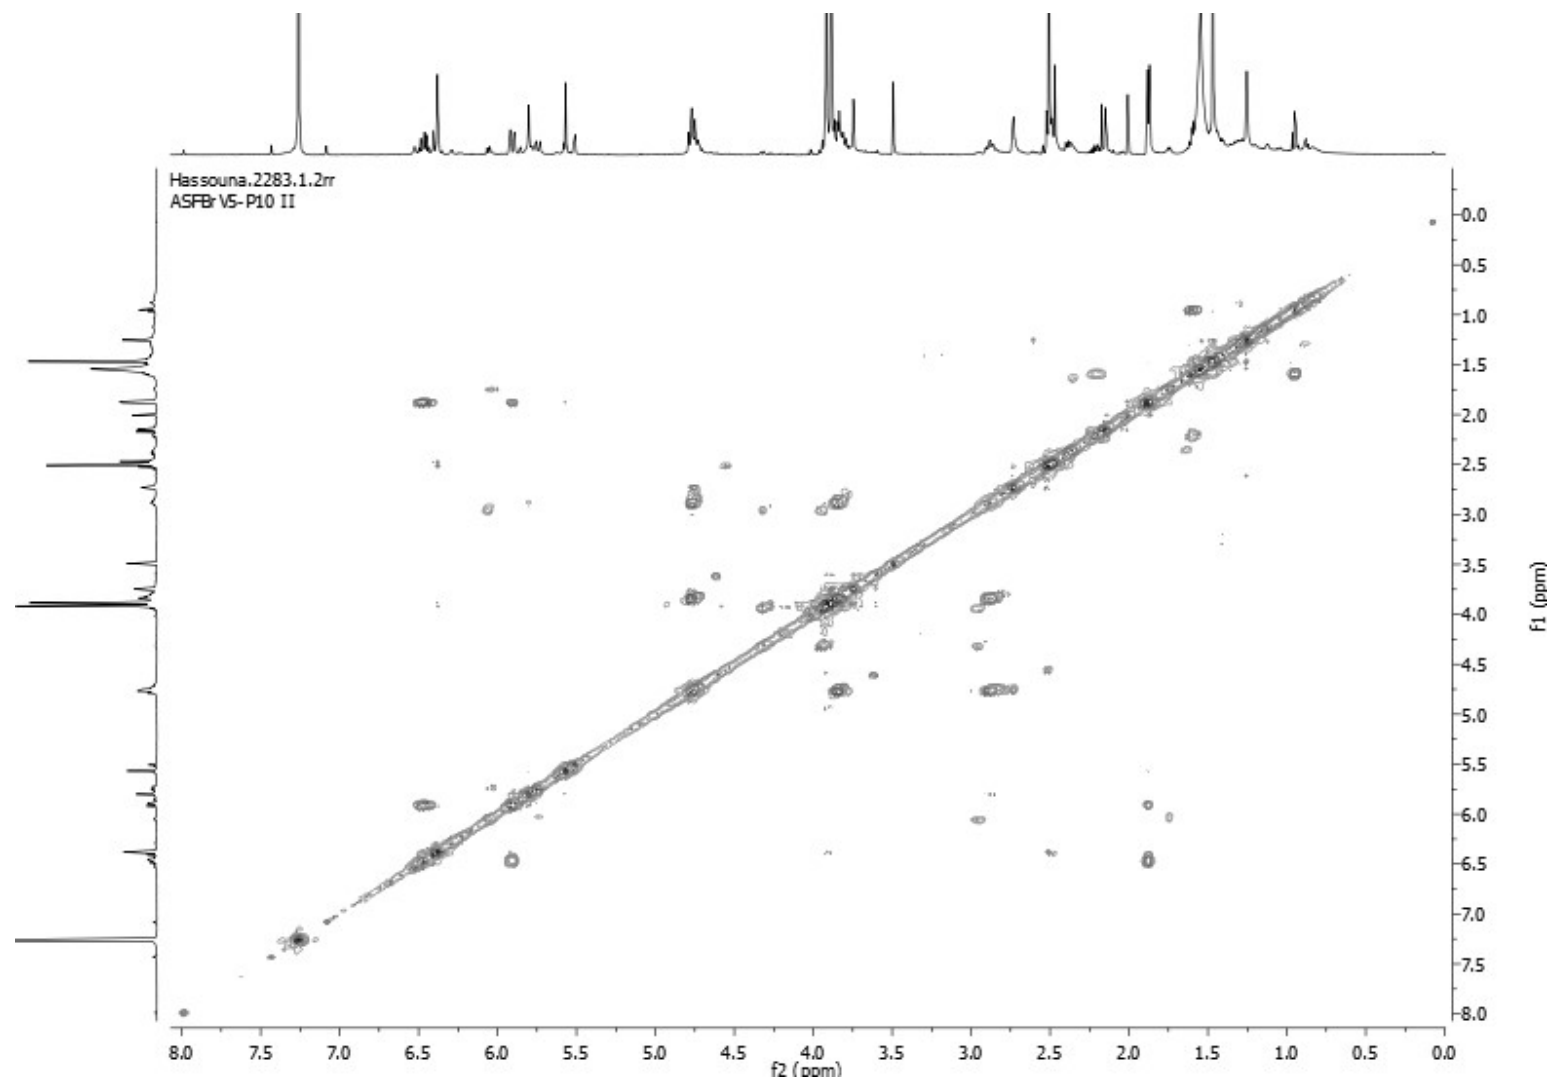

Figure S27. HSQC (600 MHz/150 MHz, CDCl<sub>3</sub>) spectrum of compound **8**.

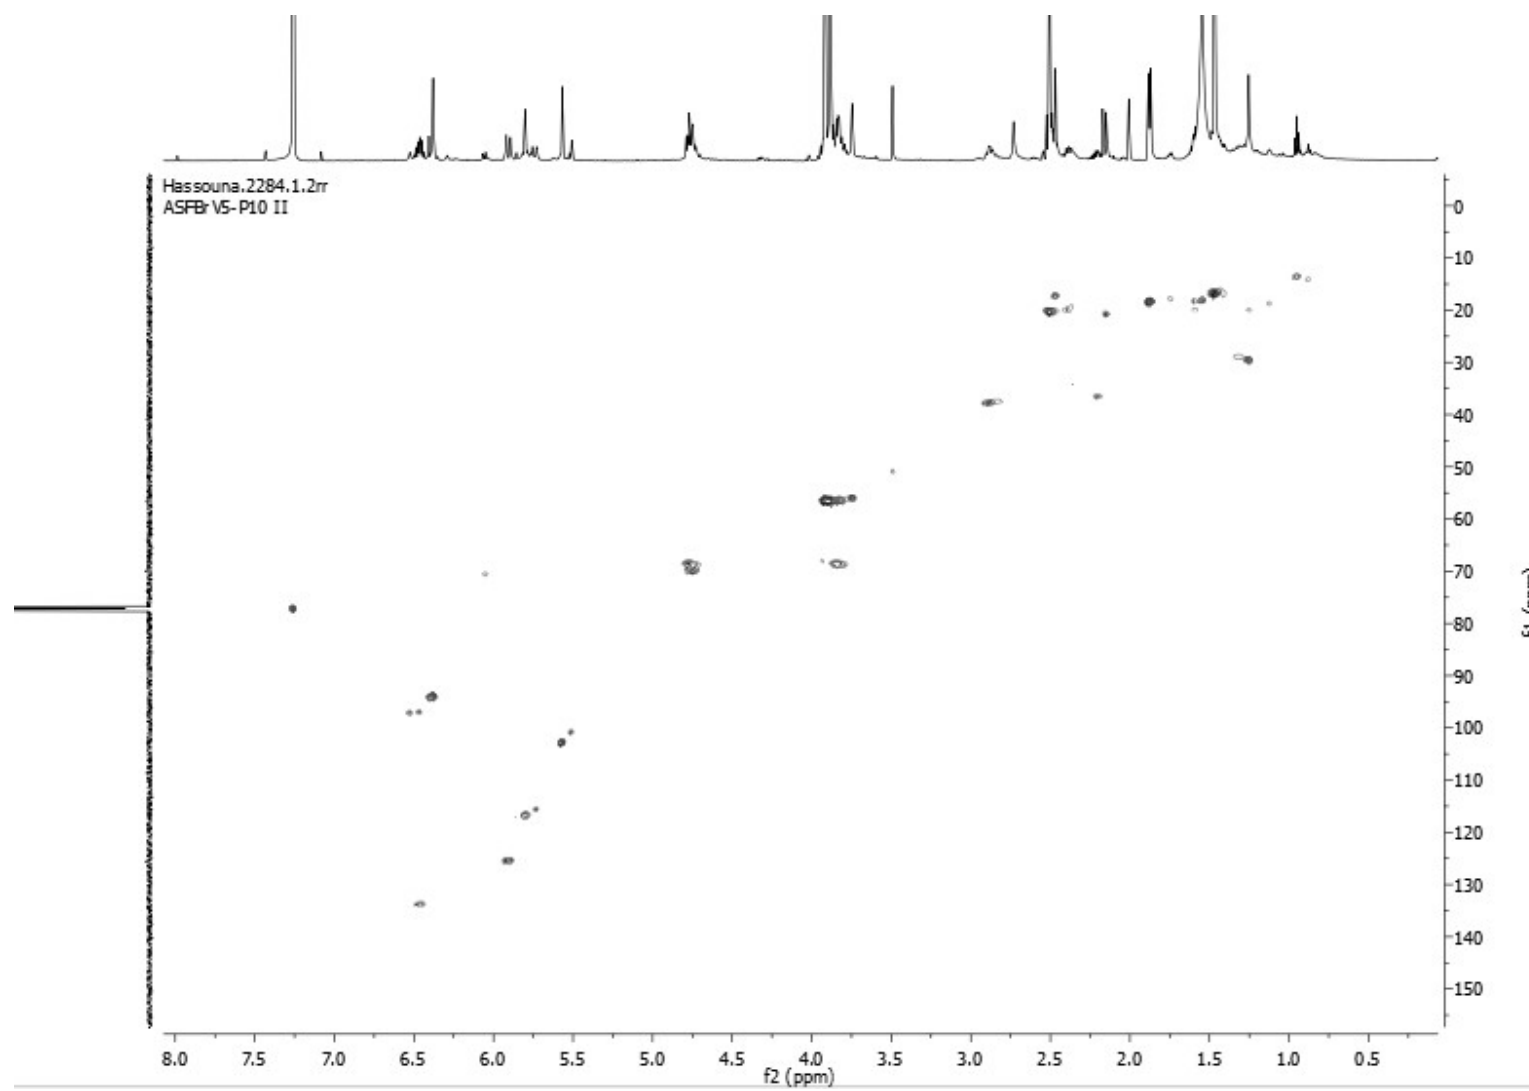

Figure S28. HMBC (600 MHz/150 MHz, CDCl<sub>3</sub>) spectrum of compound **8**.

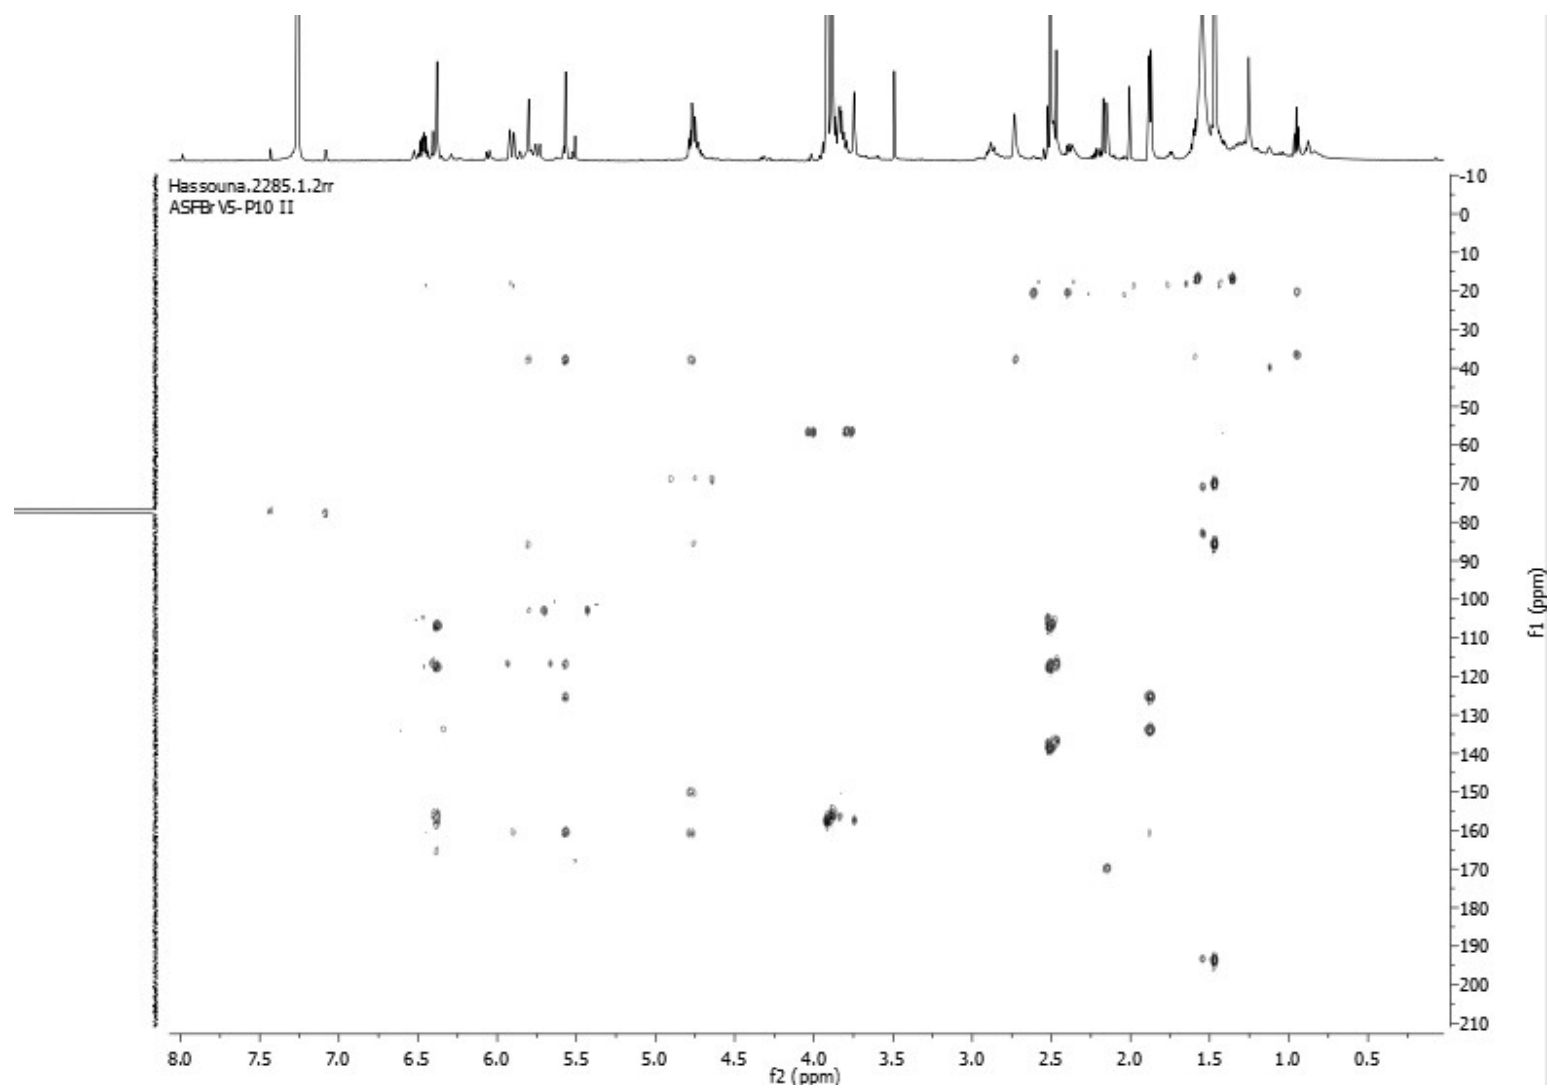

Figure S29. ROESY (600 MHz, CDCl<sub>3</sub>) spectrum of compound **8**.

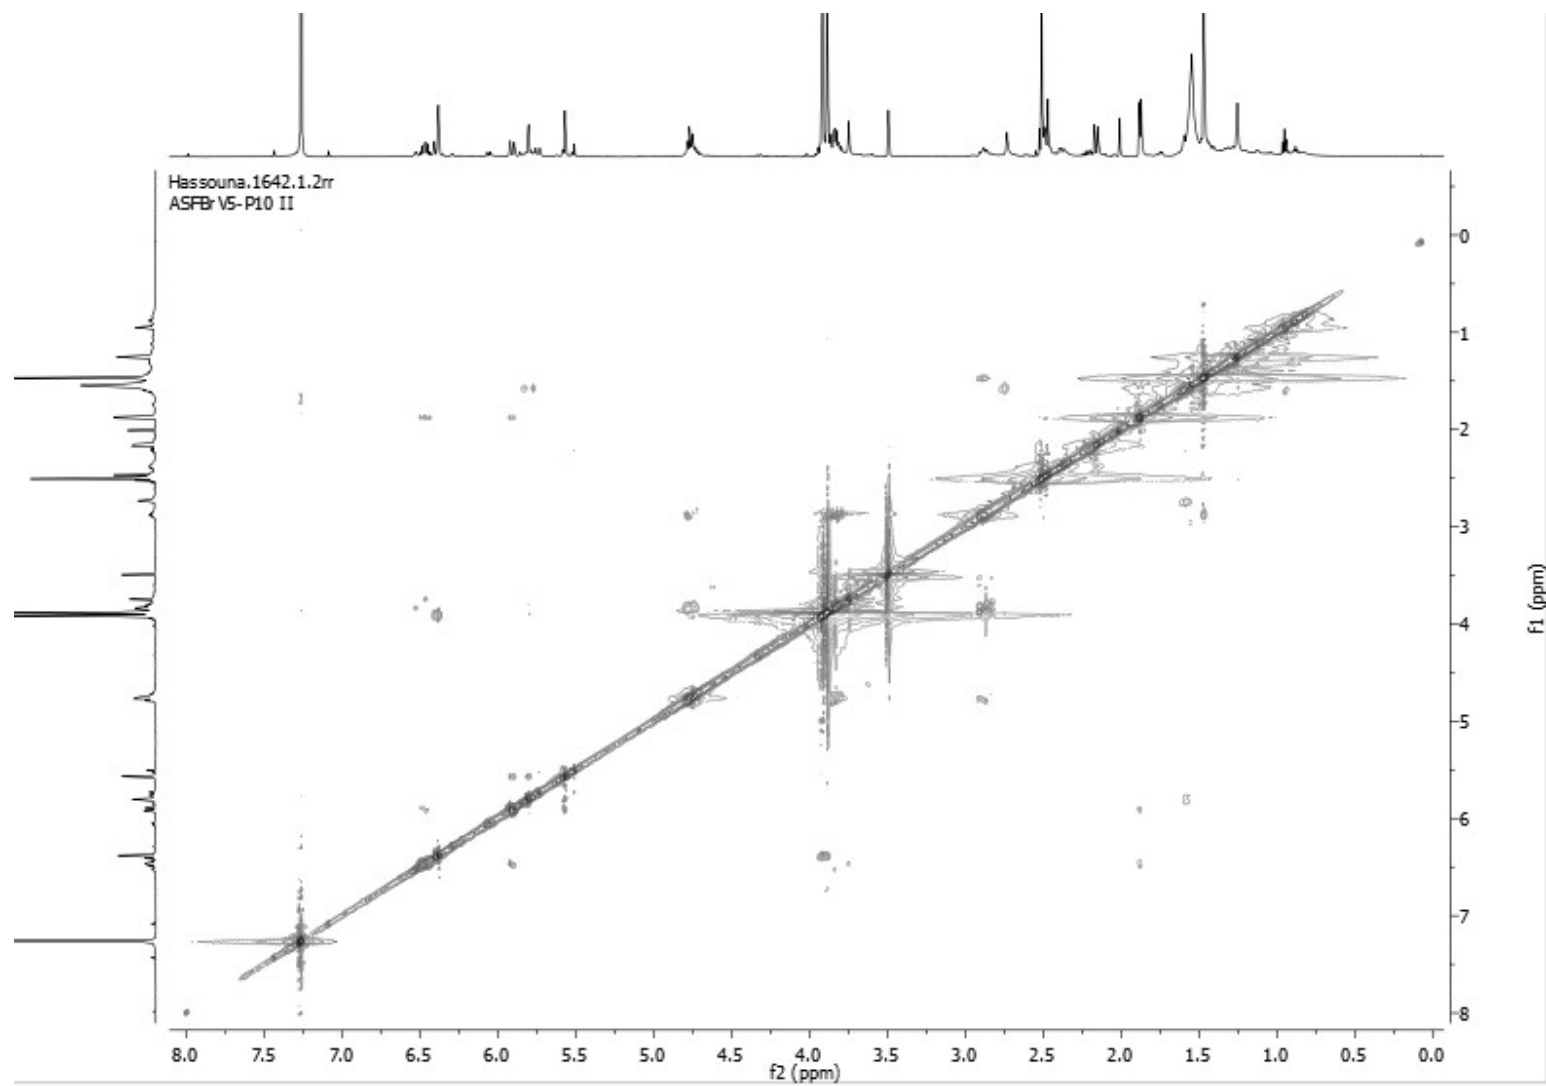

Figure S30. UV spectrum of compound **9**.

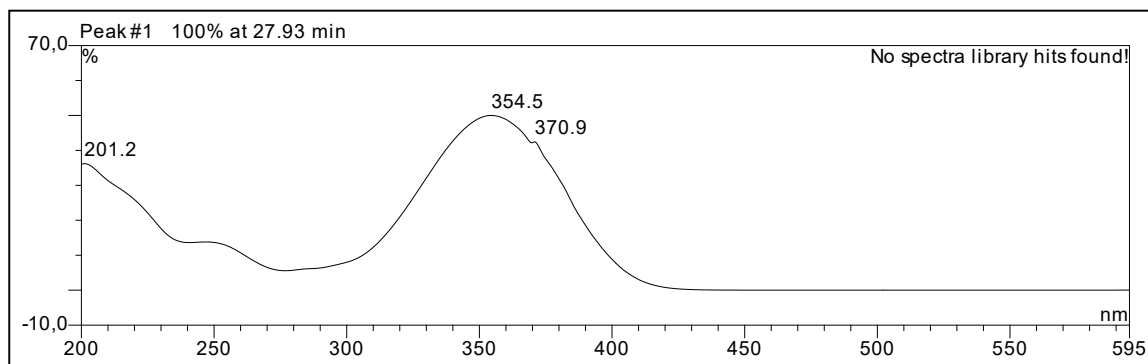

Figure S31. HRESIMS of compound **9**.

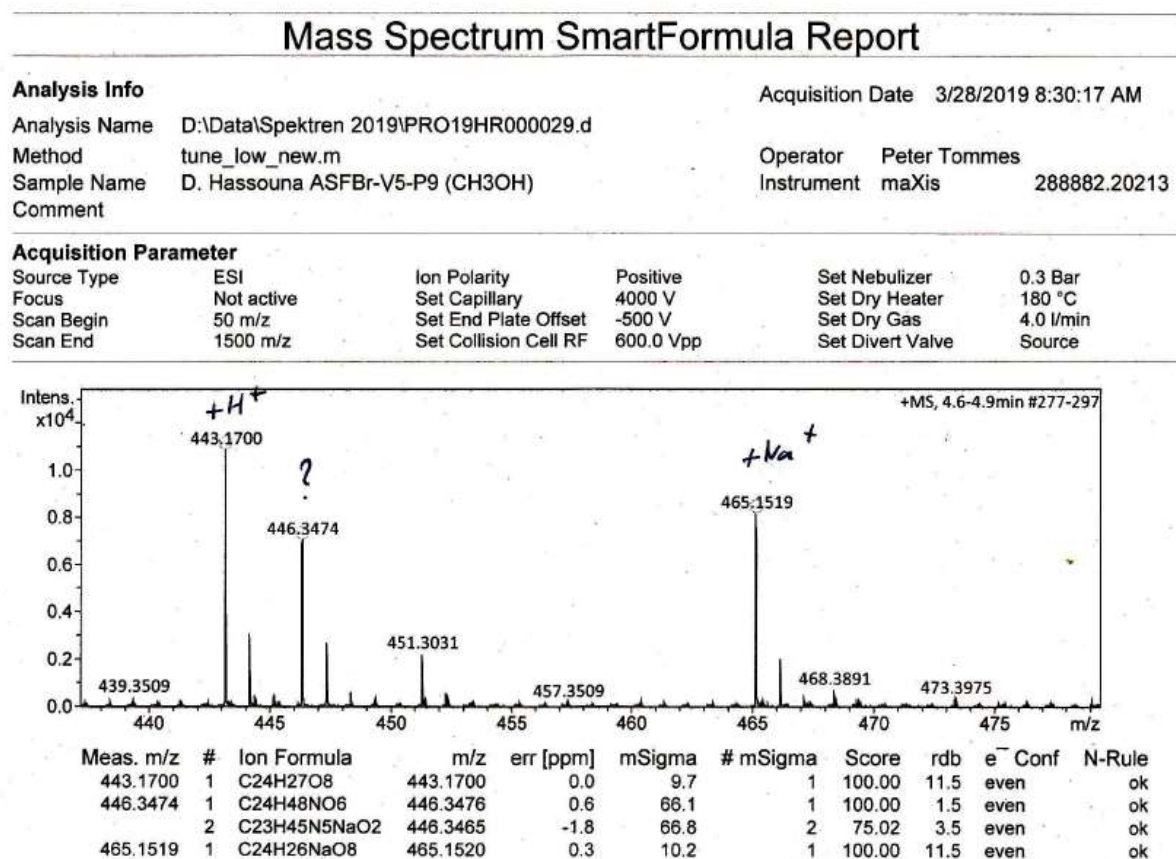

Figure S32.  $^1\text{H}$  NMR (700 MHz,  $\text{CDCl}_3$ ) spectrum of compound **9**.

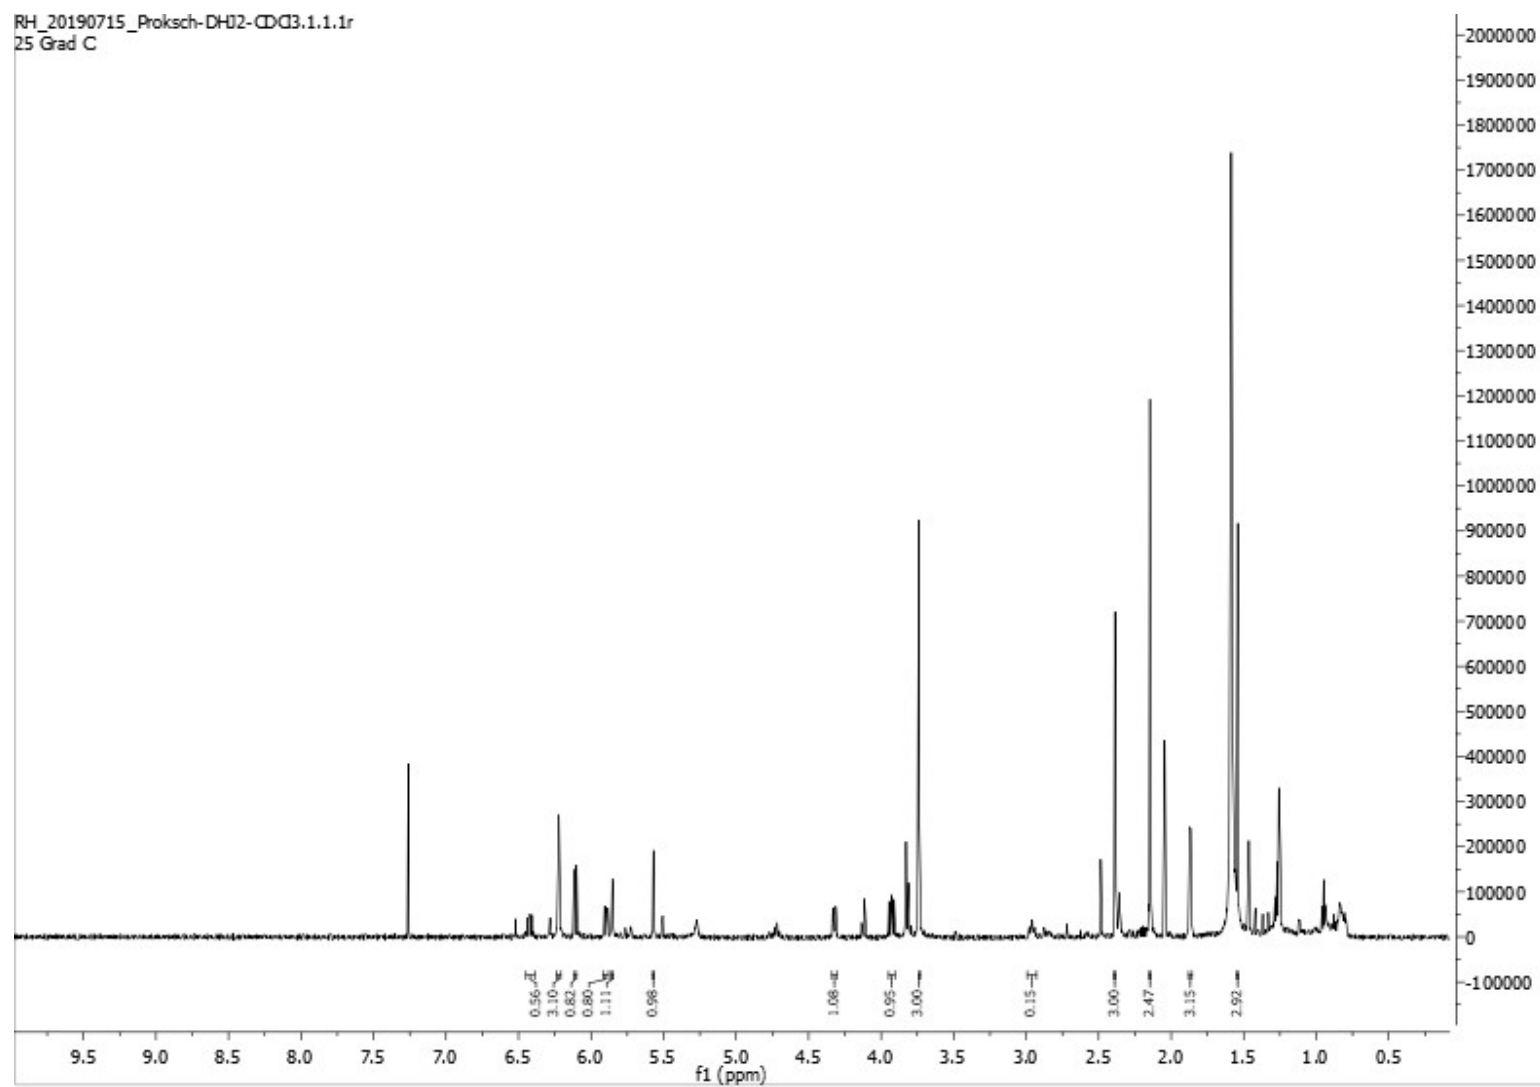

Figure S33.  $^{13}\text{C}$  NMR (175 MHz,  $\text{CDCl}_3$ ) spectrum of compound **9**.

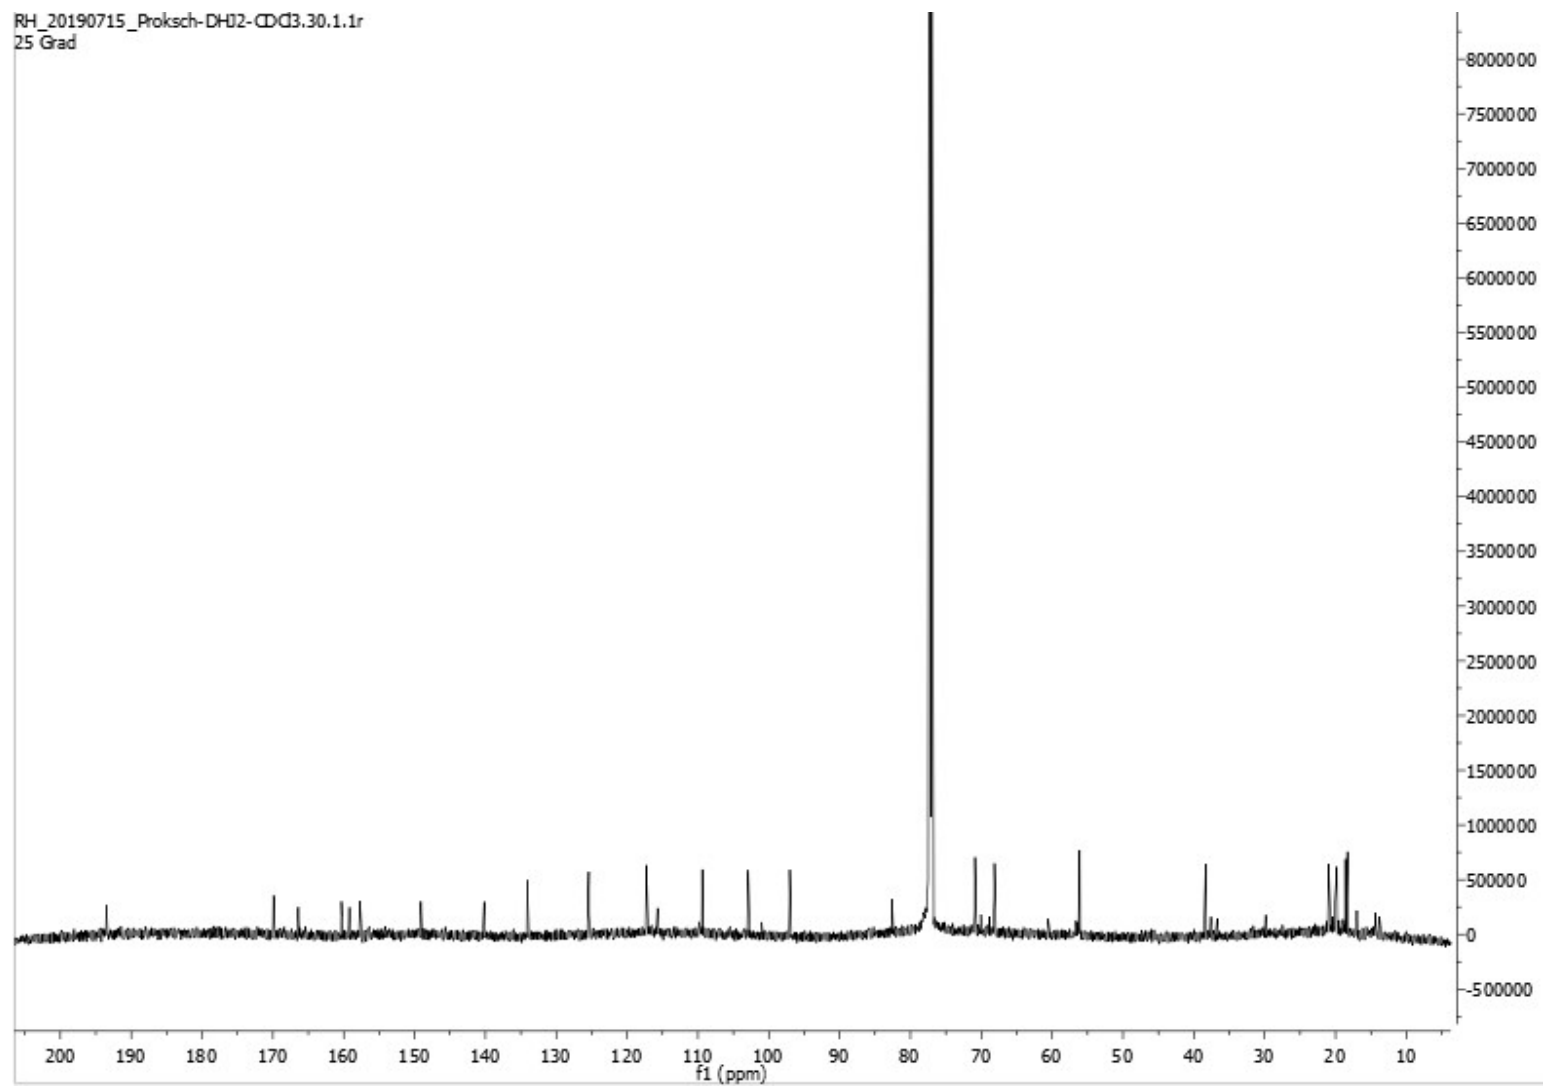

Figure S34. COSY (700 MHz, CDCl<sub>3</sub>) spectrum of compound **9**.

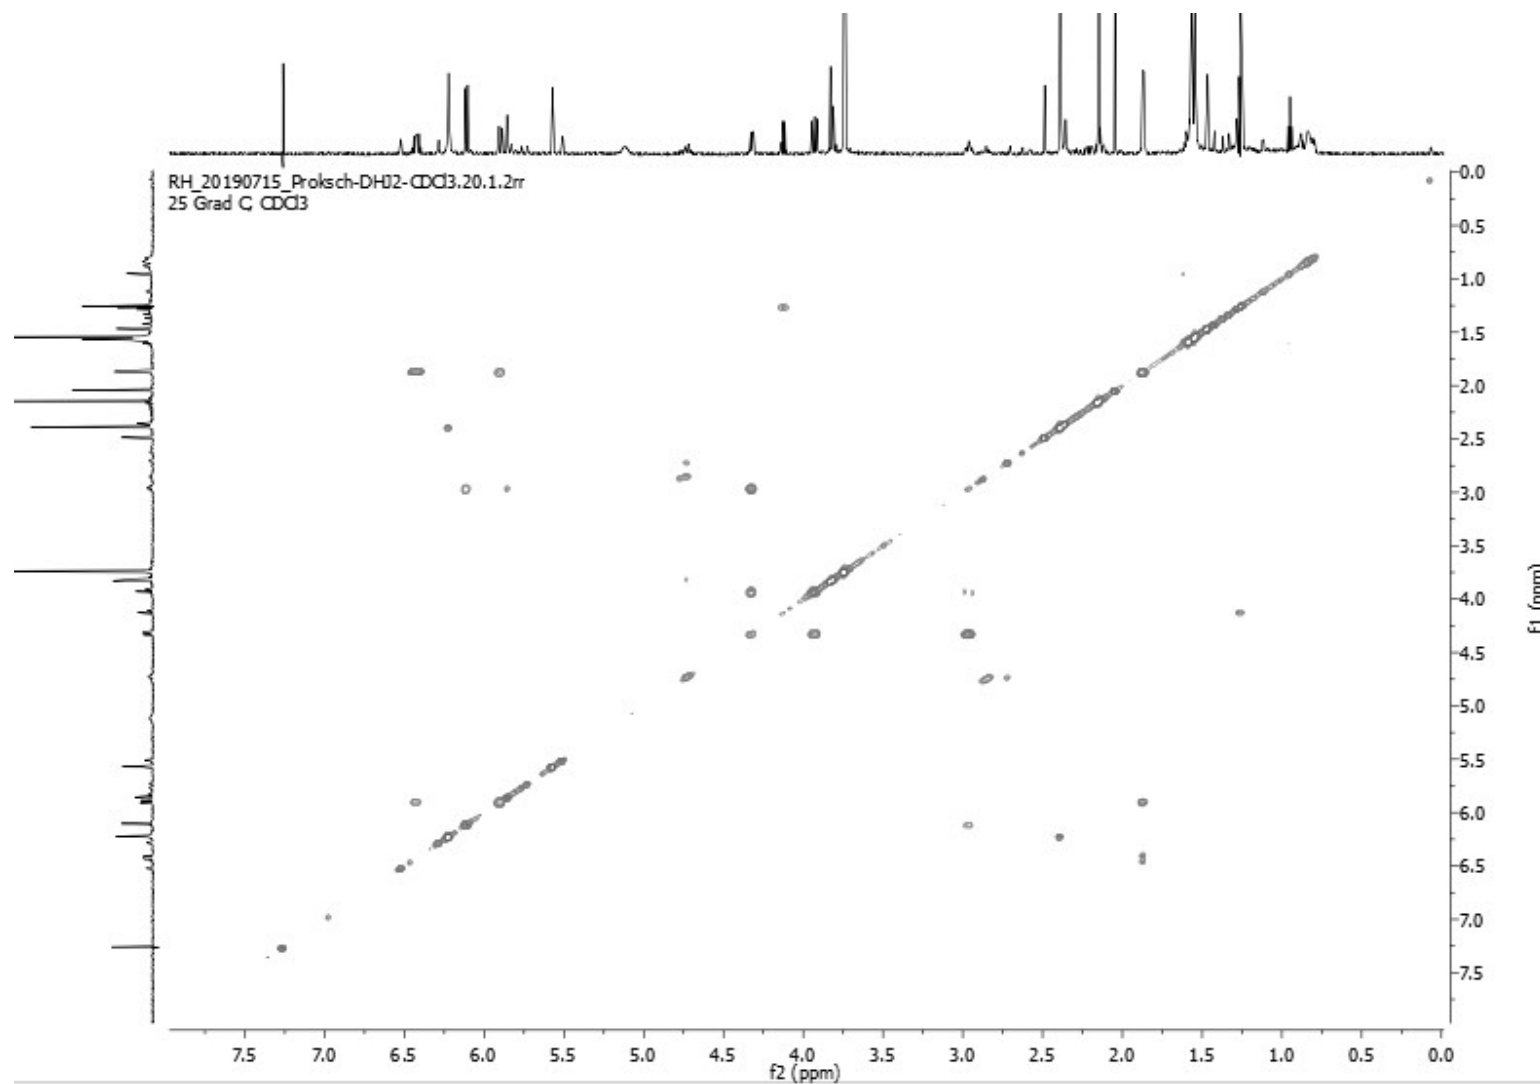



Figure S35. HSQC (700 MHz/175 MHz, CDCl<sub>3</sub>) spectrum of compound **9**.

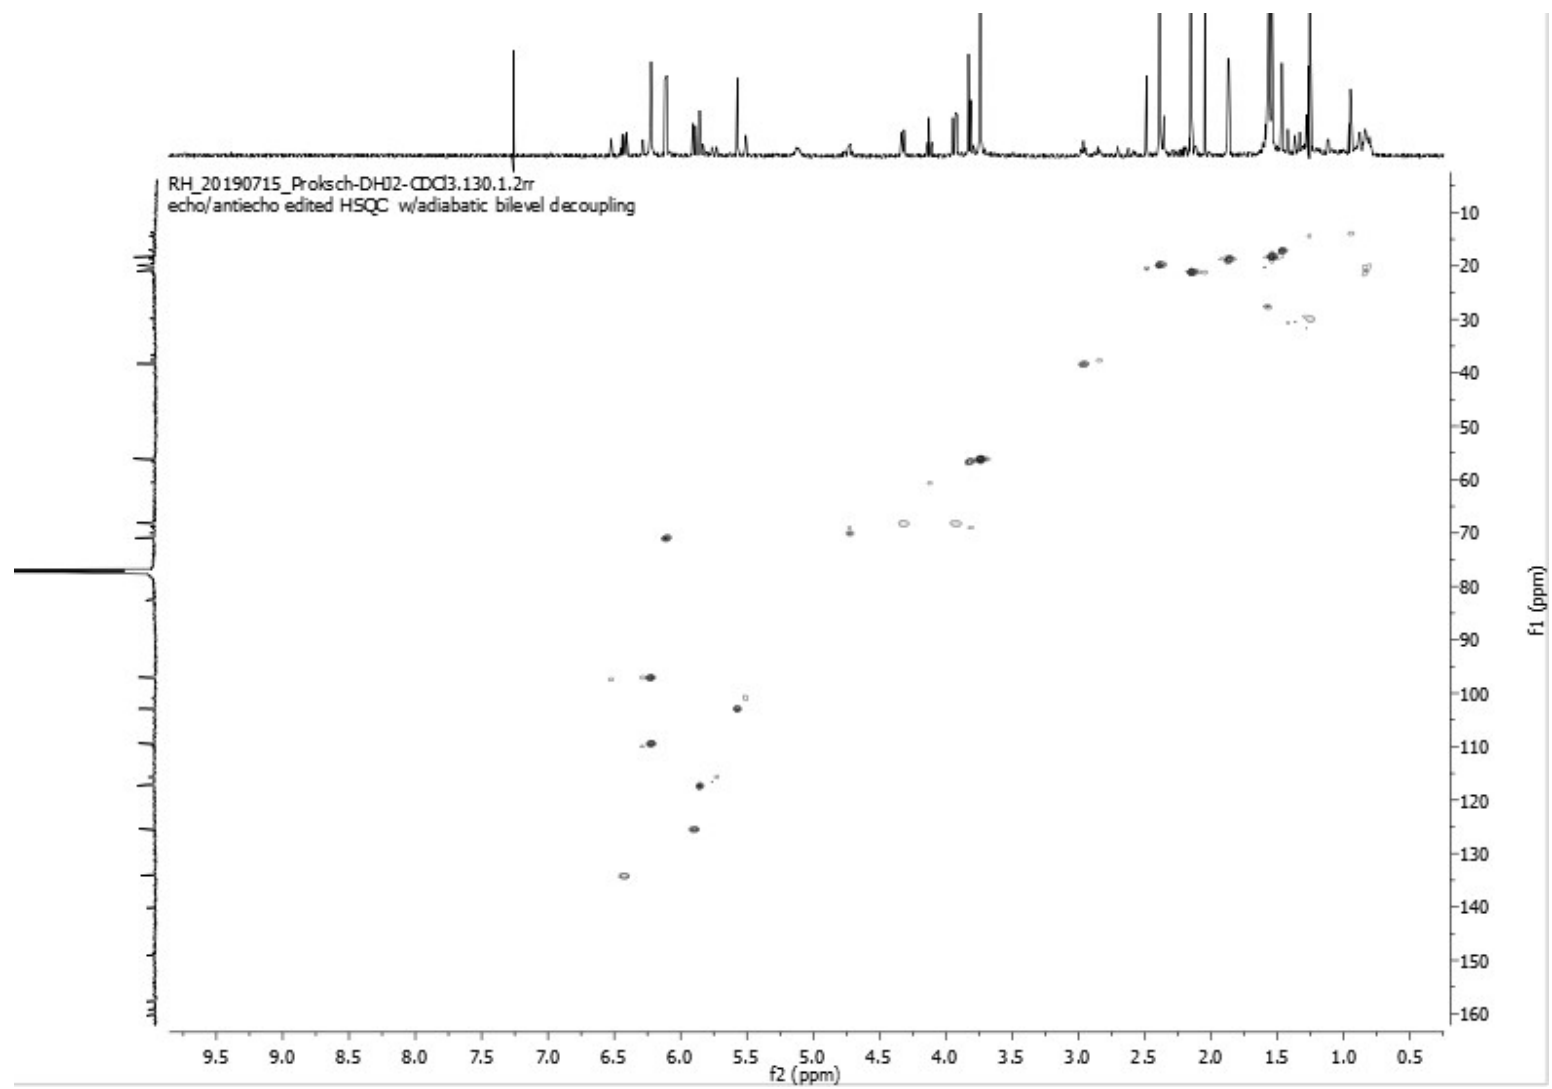

Figure S36. HMBC (700 MHz/175 MHz, CDCl<sub>3</sub>) spectrum of compound **9**.

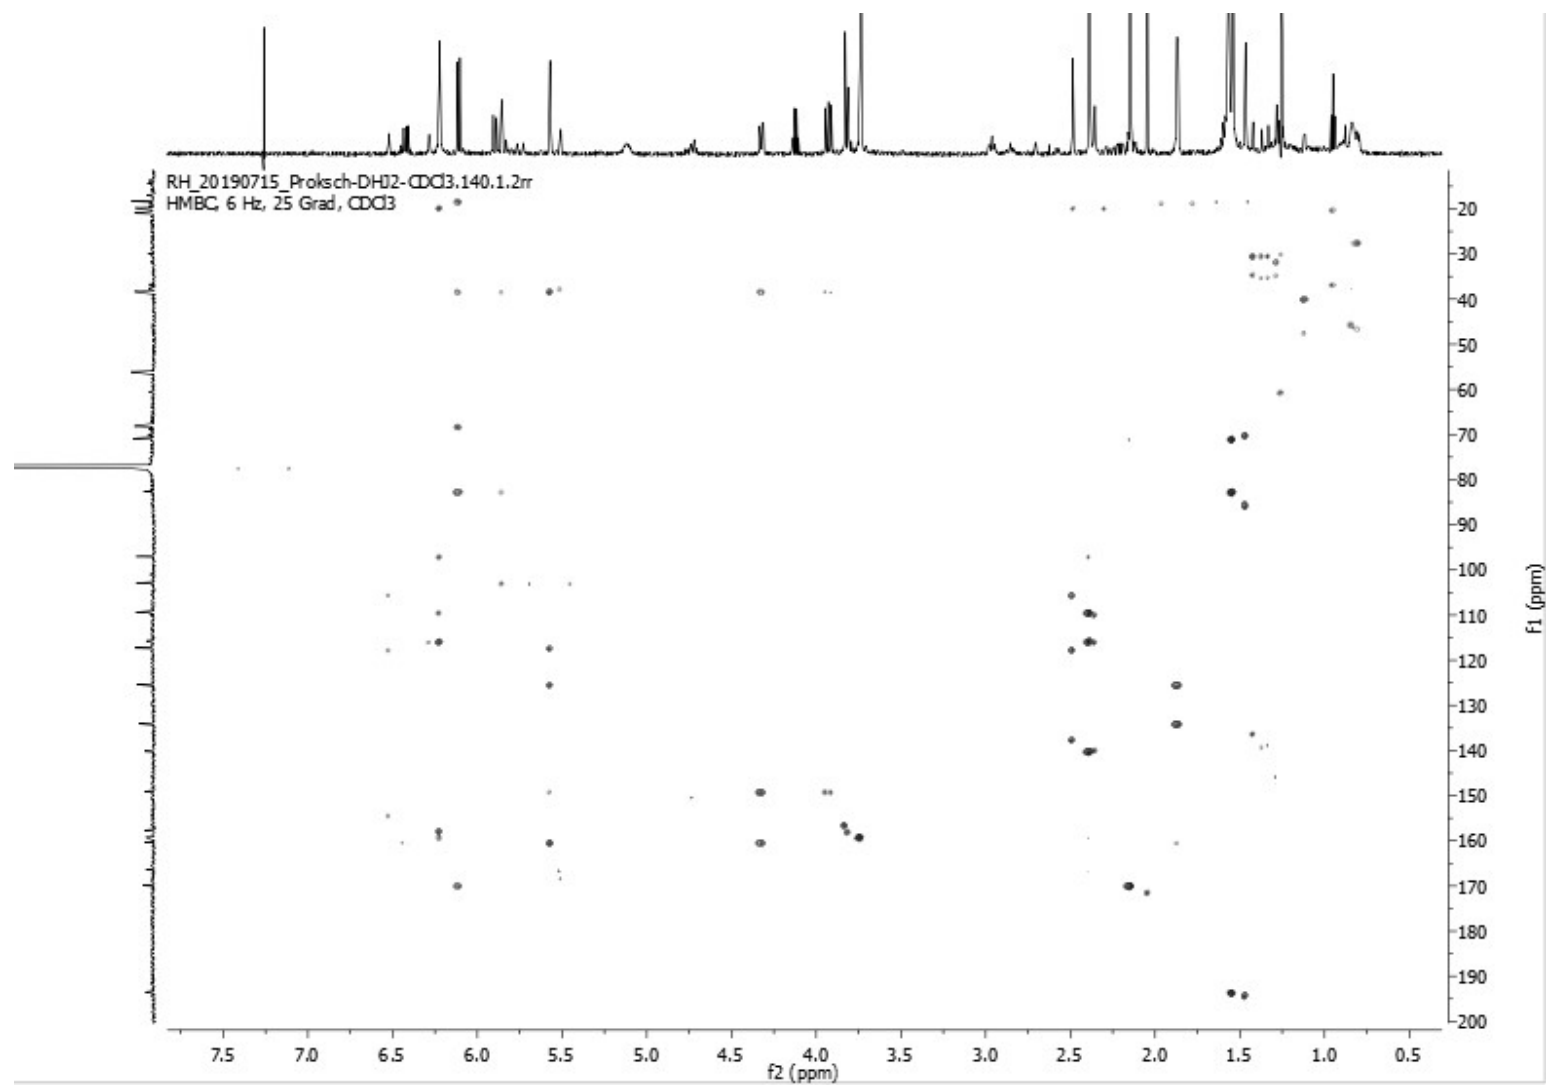

Figure S37. ROESY (700 MHz, CDCl<sub>3</sub>) spectrum of compound 9.

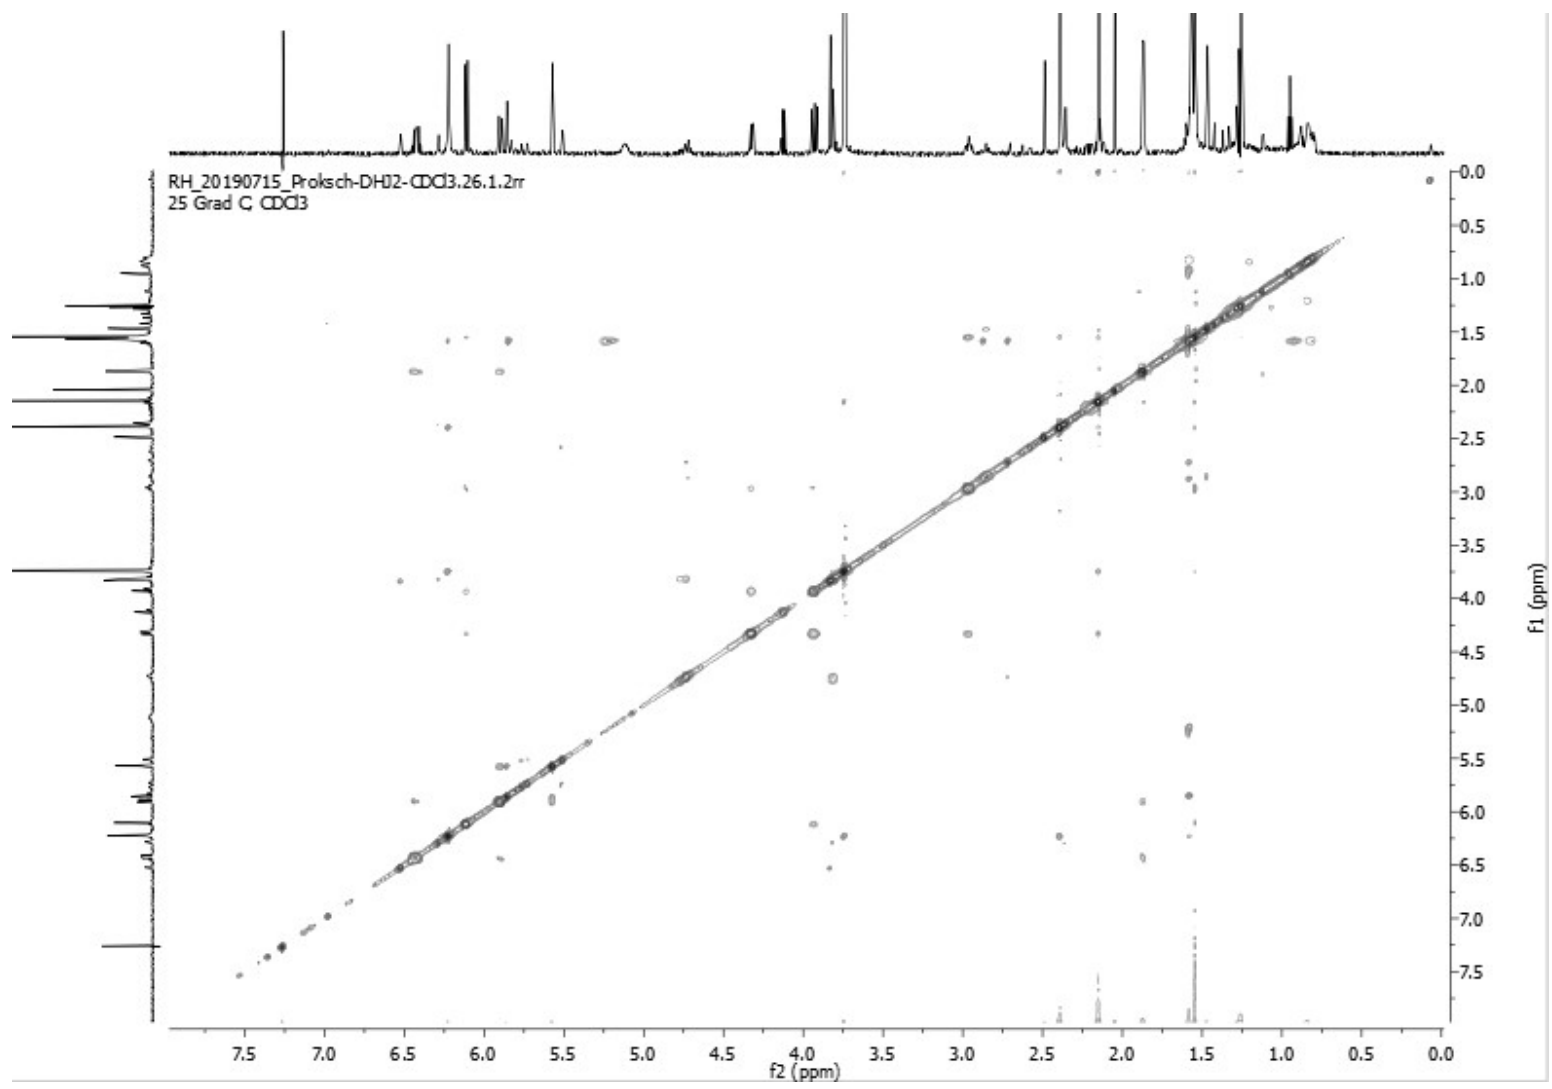

Figure S38. Section of the packing diagram over an extended unit cell of compound **5** (50% thermal ellipsoids) determined by single-crystal x-ray diffraction. Hydrogen bonds are shown in dashed yellow lines.

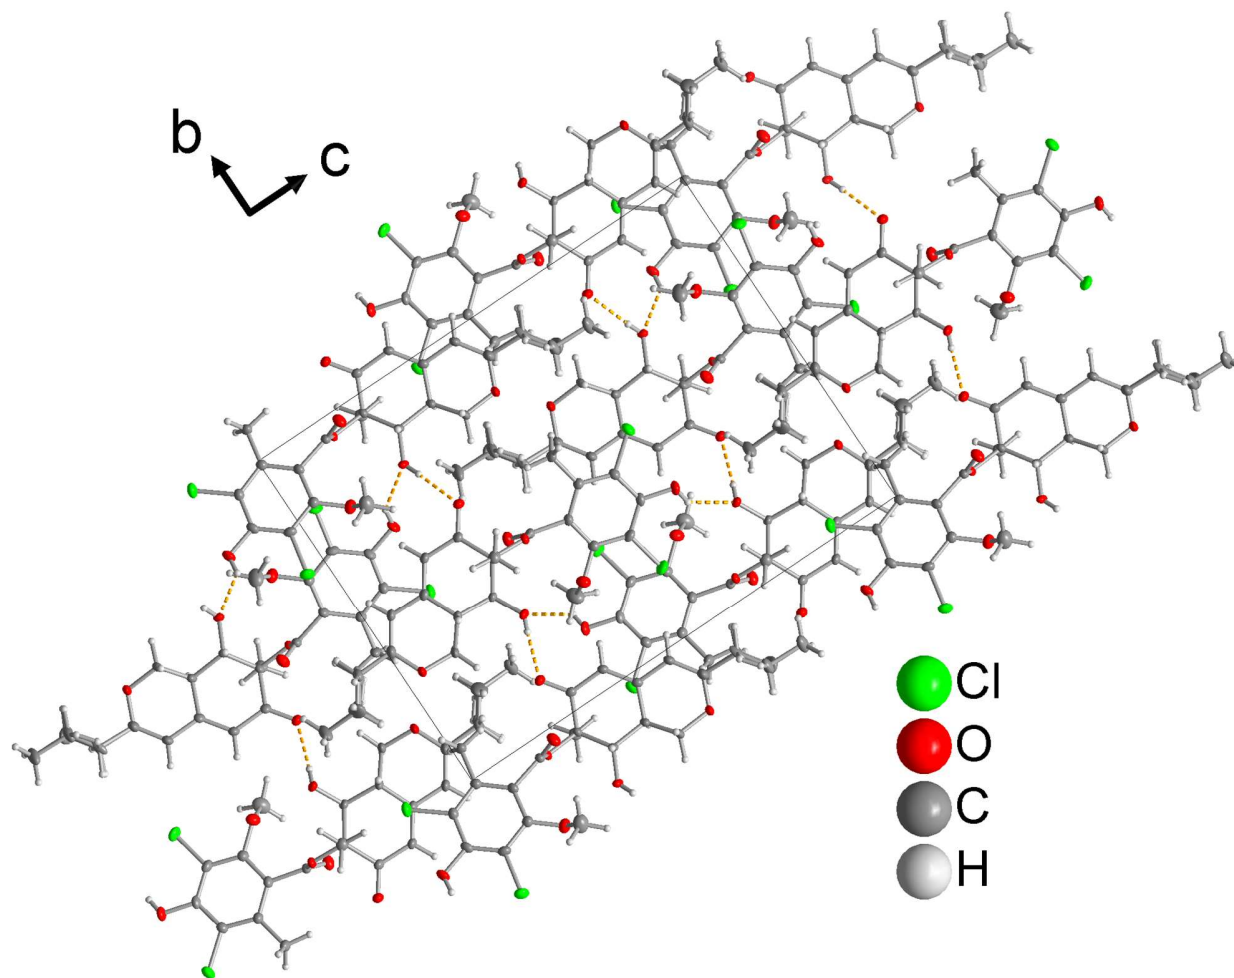

Figure S39. NF $\kappa$ B inhibitory potential of the compounds **1**, **3**, **4**, **5**, **6**, **7**, **8**, **9** and **11**. Quantification of NF $\kappa$ B-dependent luciferase activity was performed by NF $\kappa$ B inhibition assay. In short, NF $\kappa$ B-MDA-MB-231 cells were pre-treated with the twofold serial diluted compound starting with 400  $\mu$ M (**3**, **6**, **11**) or 200  $\mu$ M to 0.78  $\mu$ M (**1**, **4**, **5**, **7**, **9**, **11**) or left untreated (**Neg**). TNF $\alpha$  incubation induced NF $\kappa$ B activation, with untreated cells showing the maximal NF $\kappa$ B activity (**TNF $\alpha$** ). For RLU normalization, the RLU at the lowest concentration (0.78  $\mu$ M) in each individual experiment was set as 100 %. Each data point represents the mean of at least three independent experiments. After the logarithmic transformation of the compound concentration in molar, nonlinear regression analysis without curve fitting was applied for data illustration using GraphPad Prism (GraphPad Software, San Diego, USA; Version 8.1.2). (M) Compound concentration in molar.

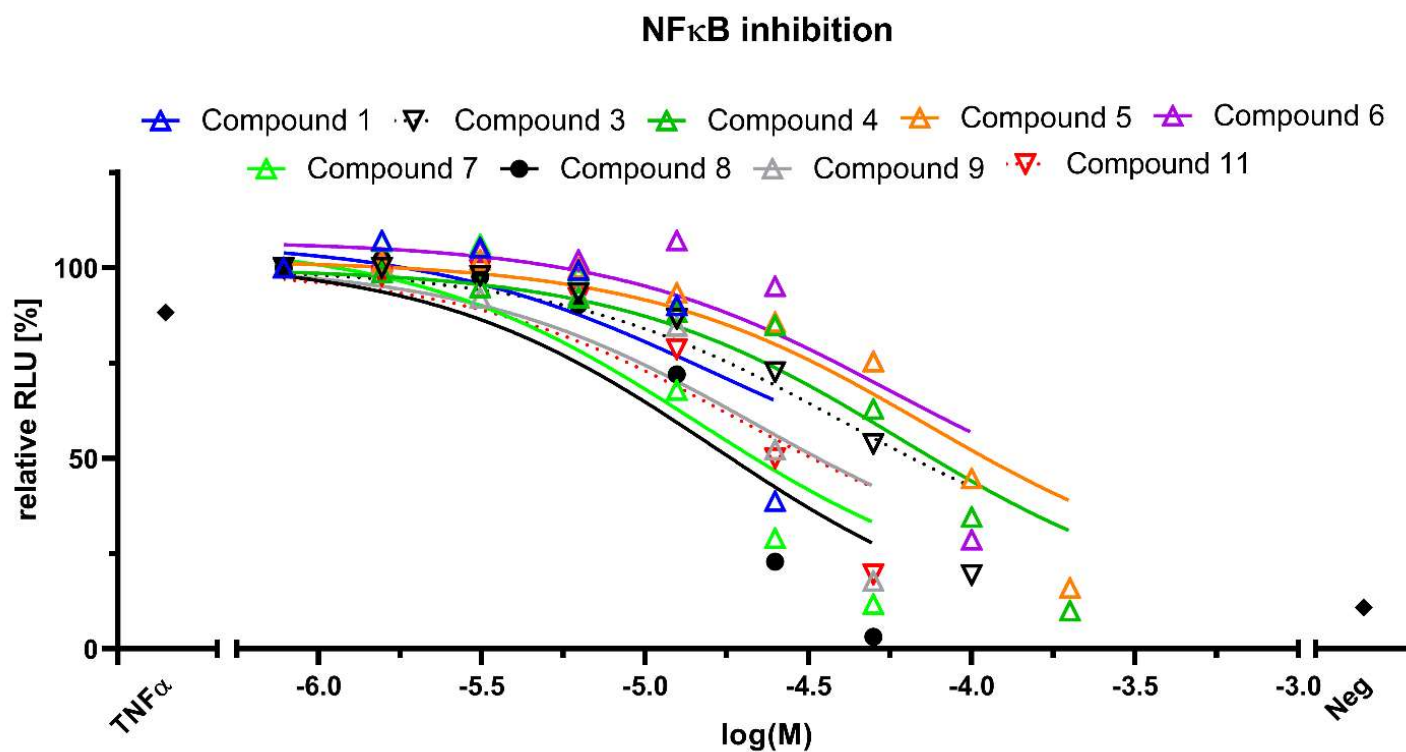

Figure S40. Potency in NF $\kappa$ B inhibition versus cytotoxicity. The scatterplot displays the pIC<sub>50</sub> for the cell viability plotted against the pIC<sub>50</sub> for the NF $\kappa$ B inhibition assay for the compounds **1**, **3**, **4**, **5**, **6**, **7**, **8**, **9** and **11**. The pIC<sub>50</sub> value is determined as the negative decadic logarithm of the IC<sub>50</sub>, which was calculated by nonlinear regression analysis without curve fitting using GraphPad Prism (GraphPad Software, San Diego, USA; Version 8.1.2). Compounds above the dotted line show greater potency in NF $\kappa$ B inhibition vs. cell viability and vice versa.

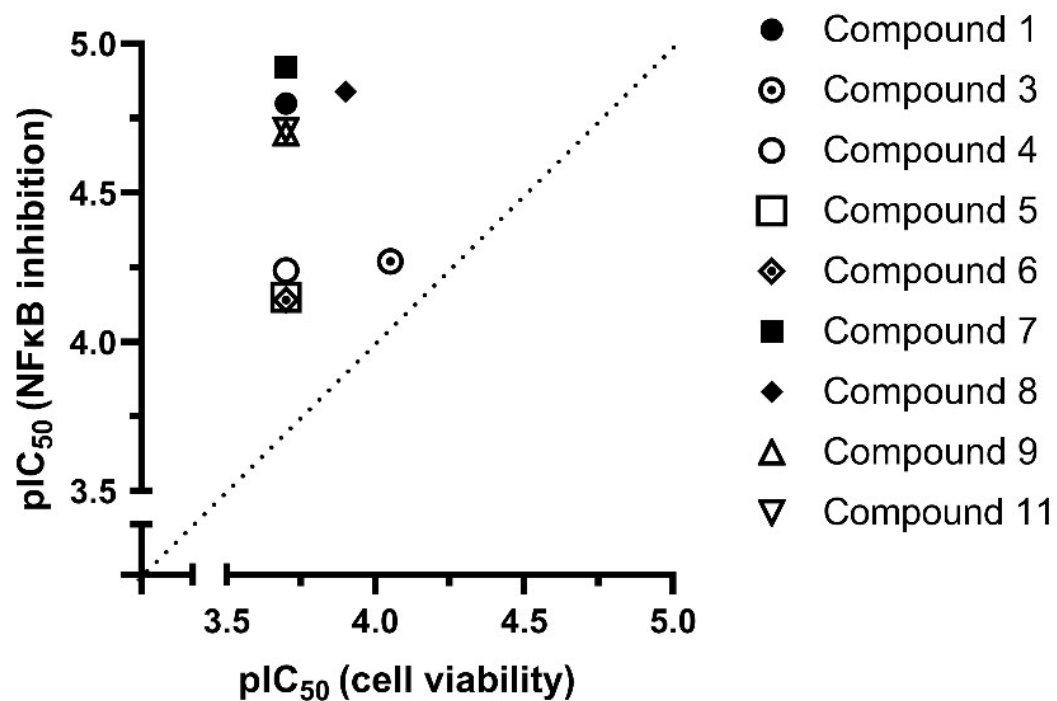

Table S1: Crystal data for compound **5**.

|                                                         |                                                               |
|---------------------------------------------------------|---------------------------------------------------------------|
| CCDC number                                             | 1976223                                                       |
| Empirical formula                                       | C <sub>22</sub> H <sub>24</sub> C <sub>2</sub> O <sub>7</sub> |
| M [g mol <sup>-1</sup> ]                                | 471.31                                                        |
| Crystal size [mm <sup>3</sup> ]                         | 0.3 x 0.3 x 0.3                                               |
| Temperature [K]                                         | 140                                                           |
| θ range [°] (completeness)                              | 3.9 – 65.9 (0.99)                                             |
| h; k; l range                                           | ±9; -14 – 16; -21 – 22                                        |
| Crystal system                                          | Orthorhombic                                                  |
| Space group                                             | P2 <sub>1</sub> 2 <sub>1</sub> 2 <sub>1</sub>                 |
| a [Å]                                                   | 8.1520(5)                                                     |
| b [Å]                                                   | 14.1088(9)                                                    |
| c [Å]                                                   | 18.7346(12)                                                   |
| α [°]                                                   | 90.0                                                          |
| β [°]                                                   | 90.0                                                          |
| γ [°]                                                   | 90.0                                                          |
| V [Å <sup>3</sup> ]                                     | 2154.8(2)                                                     |
| Z                                                       | 4                                                             |
| D <sub>calc</sub> [mg m <sup>-3</sup> ]                 | 1.453                                                         |
| μ (Cu Kα) [mm <sup>-1</sup> ]                           | 3.08                                                          |
| F(000)                                                  | 984                                                           |
| Max./min. transmission                                  | 0.753 / 0.600                                                 |
| Reflections collected                                   | 26106                                                         |
| Independent reflect. (R <sub>int</sub> )                | 3718                                                          |
| Data/restraints/parameters                              | 3718 / 311 / 0                                                |
| Max./min. Δρ [eÅ <sup>-3</sup> ] <sup>a</sup>           | -0.22 / 0.43                                                  |
| R <sub>1</sub> /wR <sub>2</sub> [I>2σ(I)] <sup>b</sup>  | 0.026 / 0.069                                                 |
| R <sub>1</sub> /wR <sub>2</sub> [all data] <sup>b</sup> | 0.026 / 0.069                                                 |
| Goodness-of-fit on F <sup>2</sup> <sup>c</sup>          | 1.03                                                          |
| Flack parameter <sup>d</sup>                            | 0.016(5)                                                      |

<sup>a</sup> Largest difference peak and hole; <sup>b</sup>  $R_1 = [\sum(|F_o| - |F_c|)/\sum|F_o|]$ ;  $wR_2 = [\sum[w(F_o^2 - F_c^2)^2]/\sum[w(F_o^2)^2]]^{1/2}$ ; <sup>c</sup> Goodness-of-fit =  $[\sum[w(F_o^2 - F_c^2)^2]/(n - p)]^{1/2}$ ; <sup>d</sup> Absolute structure parameter.

Table S2. Fractional atomic coordinates and isotropic or equivalent isotropic displacement parameters ( $\text{\AA}^2$ ) for compound **5**.

|       | <i>x</i>    | <i>y</i>     | <i>z</i>     | $U_{iso}^*/U_{eq}$ | Occ. (<1) |
|-------|-------------|--------------|--------------|--------------------|-----------|
| Cl1   | 0.24321 (8) | 0.81549 (4)  | 1.04217 (3)  | 0.03219 (17)       |           |
| O1    | 0.5589 (4)  | 0.69409 (13) | 0.53721 (10) | 0.0493 (7)         |           |
| O1''  | 0.2929 (2)  | 0.53104 (14) | 0.82263 (9)  | 0.0280 (4)         |           |
| C1''  | 0.3988 (3)  | 0.55041 (16) | 0.86460 (12) | 0.0197 (5)         |           |
| C1A   | 0.5101 (5)  | 0.70018 (19) | 0.61155 (13) | 0.0388 (8)         |           |
| H1AA  | 0.389878    | 0.691728     | 0.615360     | 0.047*             |           |
| H1AB  | 0.537897    | 0.763740     | 0.630398     | 0.047*             |           |
| Cl2   | 0.39219 (8) | 0.46808 (5)  | 1.13798 (3)  | 0.02943 (16)       |           |
| O2    | 0.5498 (2)  | 0.38313 (11) | 0.78063 (9)  | 0.0257 (4)         |           |
| O2''  | 0.3218 (2)  | 0.73236 (13) | 0.89865 (10) | 0.0303 (4)         |           |
| C2''  | 0.3698 (3)  | 0.57644 (17) | 0.94185 (12) | 0.0205 (5)         |           |
| O3    | 0.5598 (2)  | 0.55473 (11) | 0.84990 (8)  | 0.0181 (3)         |           |
| O3''  | 0.2951 (2)  | 0.66247 (14) | 1.15017 (9)  | 0.0262 (4)         |           |
| C3    | 0.5456 (5)  | 0.6063 (2)   | 0.50865 (14) | 0.0372 (7)         |           |
| C3''  | 0.3220 (3)  | 0.66943 (17) | 0.95431 (13) | 0.0221 (5)         |           |
| C3'   | 0.4783 (5)  | 0.6862 (3)   | 0.31316 (14) | 0.0468 (9)         |           |
| H3'A  | 0.402981    | 0.733835     | 0.293872     | 0.056*             |           |
| H3'B  | 0.451852    | 0.623986     | 0.292861     | 0.056*             |           |
| H3'C  | 0.591316    | 0.703135     | 0.300684     | 0.056*             |           |
| H3''O | 0.245 (5)   | 0.711 (3)    | 1.155 (2)    | 0.045 (10)*        |           |
| O4    | 0.6083 (2)  | 0.71764 (12) | 0.76564 (9)  | 0.0224 (4)         |           |
| C4    | 0.5357 (3)  | 0.52728 (18) | 0.54849 (12) | 0.0253 (5)         |           |
| H4    | 0.514439    | 0.468460     | 0.525616     | 0.030*             |           |
| C4''  | 0.2934 (3)  | 0.69915 (17) | 1.02408 (14) | 0.0226 (5)         |           |
| C4A   | 0.5564 (3)  | 0.52915 (17) | 0.62462 (12) | 0.0193 (5)         |           |
| H4O   | 0.557 (5)   | 0.760 (3)    | 0.752 (2)    | 0.048 (11)*        |           |
| C5    | 0.5467 (3)  | 0.45072 (16) | 0.66601 (12) | 0.0198 (5)         |           |
| H5    | 0.528414    | 0.391237     | 0.643617     | 0.024*             |           |
| C5''  | 0.3139 (3)  | 0.63701 (18) | 1.08111 (12) | 0.0197 (5)         |           |



|      |             |              |              |             |            |
|------|-------------|--------------|--------------|-------------|------------|
| C6   | 0.5628 (3)  | 0.45355 (16) | 0.74267 (12) | 0.0182 (5)  |            |
| C6"  | 0.3654 (3)  | 0.54475 (17) | 1.06651 (12) | 0.0198 (5)  |            |
| C7   | 0.6131 (3)  | 0.54889 (16) | 0.77595 (11) | 0.0179 (5)  |            |
| C7"  | 0.3956 (3)  | 0.51319 (16) | 0.99741 (12) | 0.0203 (5)  |            |
| C8   | 0.5449 (3)  | 0.63334 (15) | 0.73403 (12) | 0.0175 (5)  |            |
| H8   | 0.422487    | 0.633599     | 0.737541     | 0.021*      |            |
| C8"  | 0.1640 (4)  | 0.7509 (2)   | 0.86995 (18) | 0.0431 (7)  |            |
| H8"A | 0.172803    | 0.799089     | 0.832466     | 0.065*      |            |
| H8"B | 0.091529    | 0.773985     | 0.907890     | 0.065*      |            |
| H8"C | 0.118724    | 0.692472     | 0.849679     | 0.065*      |            |
| C8A  | 0.5954 (3)  | 0.62553 (16) | 0.65544 (12) | 0.0218 (5)  |            |
| H8A  | 0.716405    | 0.636047     | 0.651994     | 0.026*      |            |
| C9   | 0.7995 (3)  | 0.55032 (18) | 0.78099 (13) | 0.0242 (5)  |            |
| H9A  | 0.846684    | 0.543759     | 0.733123     | 0.036*      |            |
| H9B  | 0.836613    | 0.497662     | 0.811049     | 0.036*      |            |
| H9C  | 0.835308    | 0.610455     | 0.802039     | 0.036*      |            |
| C9"  | 0.4537 (4)  | 0.41479 (18) | 0.98344 (13) | 0.0278 (6)  |            |
| H9"A | 0.458174    | 0.403747     | 0.931836     | 0.042*      |            |
| H9"B | 0.377677    | 0.369501     | 1.005353     | 0.042*      |            |
| H9"C | 0.563290    | 0.406388     | 1.003953     | 0.042*      |            |
| C1'A | 0.5597 (12) | 0.6085 (3)   | 0.42905 (19) | 0.0314 (18) | 0.775 (19) |
| H1'A | 0.676302    | 0.618190     | 0.416185     | 0.038*      | 0.775 (19) |
| H1'B | 0.526074    | 0.545947     | 0.410056     | 0.038*      | 0.775 (19) |
| C2'A | 0.4610 (8)  | 0.6823 (5)   | 0.3940 (3)   | 0.0348 (14) | 0.775 (19) |
| H2'A | 0.492628    | 0.744633     | 0.413960     | 0.042*      | 0.775 (19) |
| H2'B | 0.344101    | 0.671564     | 0.405934     | 0.042*      | 0.775 (19) |
| C1'B | 0.467 (3)   | 0.6112 (11)  | 0.4296 (7)   | 0.027 (4)   | 0.225 (19) |
| H1'C | 0.479037    | 0.549208     | 0.405513     | 0.033*      | 0.225 (19) |
| H1'D | 0.348780    | 0.626511     | 0.432761     | 0.033*      | 0.225 (19) |
| C2'B | 0.553 (7)   | 0.6847 (19)  | 0.3890 (14)  | 0.087 (13)  | 0.225 (19) |
| H2'C | 0.671573    | 0.670387     | 0.386669     | 0.104*      | 0.225 (19) |
| H2'D | 0.538411    | 0.747193     | 0.412247     | 0.104*      | 0.225 (19) |

Table S3. Atomic displacement parameters ( $\text{\AA}^2$ ) for compound **5**.

|      | $U^{11}$    | $U^{22}$    | $U^{33}$    | $U^{12}$     | $U^{13}$     | $U^{23}$     |
|------|-------------|-------------|-------------|--------------|--------------|--------------|
| Cl1  | 0.0442 (4)  | 0.0200 (3)  | 0.0323 (3)  | 0.0081 (3)   | 0.0045 (3)   | -0.0070 (2)  |
| O1   | 0.120 (2)   | 0.0177 (9)  | 0.0104 (8)  | -0.0031 (12) | 0.0016 (11)  | 0.0000 (7)   |
| O1'' | 0.0299 (9)  | 0.0345 (10) | 0.0196 (8)  | -0.0048 (8)  | 0.0009 (7)   | -0.0044 (8)  |
| C1'' | 0.0300 (12) | 0.0145 (11) | 0.0147 (10) | -0.0003 (10) | 0.0004 (10)  | -0.0010 (9)  |
| C1A  | 0.088 (2)   | 0.0173 (13) | 0.0114 (11) | 0.0047 (14)  | -0.0014 (13) | -0.0024 (10) |
| Cl2  | 0.0390 (3)  | 0.0322 (3)  | 0.0171 (3)  | 0.0051 (3)   | -0.0005 (2)  | 0.0059 (2)   |
| O2   | 0.0435 (10) | 0.0141 (8)  | 0.0197 (8)  | -0.0005 (7)  | -0.0004 (8)  | 0.0014 (7)   |
| O2'' | 0.0374 (10) | 0.0263 (10) | 0.0271 (10) | 0.0031 (8)   | 0.0031 (8)   | 0.0060 (8)   |
| C2'' | 0.0271 (11) | 0.0190 (11) | 0.0155 (11) | -0.0006 (9)  | 0.0041 (10)  | -0.0026 (9)  |
| O3   | 0.0259 (8)  | 0.0174 (8)  | 0.0110 (7)  | 0.0009 (6)   | 0.0014 (6)   | -0.0010 (6)  |
| O3'' | 0.0345 (10) | 0.0285 (10) | 0.0158 (9)  | 0.0020 (8)   | 0.0052 (7)   | -0.0067 (7)  |
| C3   | 0.073 (2)   | 0.0224 (13) | 0.0163 (12) | 0.0002 (14)  | 0.0015 (13)  | -0.0033 (10) |
| C3'' | 0.0278 (12) | 0.0189 (12) | 0.0194 (12) | 0.0008 (10)  | 0.0027 (10)  | 0.0010 (10)  |
| C3'  | 0.074 (2)   | 0.0469 (19) | 0.0195 (14) | 0.0284 (17)  | -0.0023 (14) | 0.0035 (13)  |
| O4   | 0.0379 (9)  | 0.0118 (8)  | 0.0175 (8)  | 0.0005 (8)   | -0.0054 (7)  | -0.0028 (7)  |
| C4   | 0.0429 (14) | 0.0179 (12) | 0.0152 (11) | 0.0005 (11)  | 0.0006 (10)  | -0.0049 (9)  |
| C4'' | 0.0264 (12) | 0.0159 (11) | 0.0255 (12) | 0.0019 (9)   | 0.0045 (10)  | -0.0049 (10) |
| C4A  | 0.0237 (11) | 0.0166 (11) | 0.0175 (11) | 0.0009 (9)   | 0.0029 (9)   | -0.0036 (9)  |
| C5   | 0.0282 (11) | 0.0142 (11) | 0.0171 (11) | 0.0004 (10)  | 0.0015 (9)   | -0.0036 (9)  |
| C5'' | 0.0197 (10) | 0.0243 (12) | 0.0152 (11) | -0.0002 (9)  | 0.0035 (9)   | -0.0053 (10) |
| C6   | 0.0219 (11) | 0.0144 (11) | 0.0182 (11) | 0.0023 (9)   | 0.0026 (9)   | -0.0016 (9)  |
| C6'' | 0.0218 (11) | 0.0215 (12) | 0.0162 (11) | 0.0013 (9)   | 0.0009 (9)   | 0.0020 (9)   |
| C7   | 0.0265 (11) | 0.0155 (11) | 0.0116 (10) | 0.0013 (9)   | 0.0013 (9)   | -0.0022 (9)  |
| C7'' | 0.0250 (11) | 0.0179 (11) | 0.0180 (11) | 0.0008 (9)   | 0.0023 (9)   | -0.0013 (9)  |
| C8   | 0.0263 (11) | 0.0121 (10) | 0.0143 (10) | -0.0005 (9)  | -0.0004 (9)  | -0.0028 (9)  |
| C8'' | 0.0405 (16) | 0.0493 (18) | 0.0396 (17) | 0.0110 (14)  | 0.0018 (14)  | 0.0076 (14)  |
| C8A  | 0.0376 (13) | 0.0140 (11) | 0.0138 (11) | -0.0037 (10) | 0.0030 (10)  | -0.0021 (9)  |
| C9   | 0.0245 (12) | 0.0245 (12) | 0.0235 (12) | 0.0019 (10)  | -0.0018 (10) | -0.0021 (10) |
| C9'' | 0.0462 (15) | 0.0183 (12) | 0.0190 (12) | 0.0030 (12)  | 0.0069 (11)  | -0.0019 (10) |
| C1'A | 0.054 (5)   | 0.0257 (19) | 0.0148 (18) | 0.009 (2)    | 0.000 (2)    | -0.0013 (13) |
| C2'A | 0.049 (3)   | 0.041 (3)   | 0.014 (2)   | 0.014 (3)    | -0.002 (2)   | -0.0002 (19) |
| C1'B | 0.013 (9)   | 0.053 (9)   | 0.016 (6)   | -0.002 (6)   | -0.002 (6)   | -0.013 (6)   |
| C2'B | 0.18 (4)    | 0.040 (11)  | 0.038 (11)  | -0.02 (2)    | 0.04 (2)     | 0.009 (9)    |

Table S4. Geometric parameters (Å, °) for compound 5.

|             |            |             |           |
|-------------|------------|-------------|-----------|
| C11—C4"     | 1.725 (2)  | C4A—C5      | 1.354 (3) |
| O1—C3       | 1.353 (3)  | C4A—C8A     | 1.511 (3) |
| O1—C1A      | 1.451 (3)  | C5—C6       | 1.443 (3) |
| O1"—C1"     | 1.199 (3)  | C5—H5       | 0.9500    |
| C1"—O3      | 1.342 (3)  | C5"—C6"     | 1.395 (4) |
| C1"—C2"     | 1.512 (3)  | C6—C7       | 1.538 (3) |
| C1A—C8A     | 1.506 (4)  | C6"—C7"     | 1.391 (3) |
| C1A—H1AA    | 0.9900     | C7—C9       | 1.523 (3) |
| C1A—H1AB    | 0.9900     | C7—C8       | 1.532 (3) |
| C12—C6"     | 1.735 (2)  | C7"—C9"     | 1.490 (3) |
| O2—C6       | 1.226 (3)  | C8—C8A      | 1.533 (3) |
| O2"—C3"     | 1.370 (3)  | C8—H8       | 1.0000    |
| O2"—C8"     | 1.419 (4)  | C8"—H8"A    | 0.9800    |
| C2"—C7"     | 1.387 (3)  | C8"—H8"B    | 0.9800    |
| C2"—C3"     | 1.388 (3)  | C8"—H8"C    | 0.9800    |
| O3—C7       | 1.454 (3)  | C8A—H8A     | 1.0000    |
| O3"—C5"     | 1.351 (3)  | C9—H9A      | 0.9800    |
| O3"—H3"O    | 0.80 (4)   | C9—H9B      | 0.9800    |
| C3—C4       | 1.344 (4)  | C9—H9C      | 0.9800    |
| C3—C1'A     | 1.496 (4)  | C9"—H9"A    | 0.9800    |
| C3—C1'B     | 1.614 (14) | C9"—H9"B    | 0.9800    |
| C3"—C4"     | 1.392 (4)  | C9"—H9"C    | 0.9800    |
| C3'—C2'A    | 1.523 (6)  | C1'A—C2'A   | 1.470 (8) |
| C3'—C2'B    | 1.55 (4)   | C1'A—H1'A   | 0.9900    |
| C3'—H3'A    | 0.9800     | C1'A—H1'B   | 0.9900    |
| C3'—H3'B    | 0.9800     | C2'A—H2'A   | 0.9900    |
| C3'—H3'C    | 0.9800     | C2'A—H2'B   | 0.9900    |
| O4—C8       | 1.426 (3)  | C1'B—C2'B   | 1.46 (4)  |
| O4—H4O      | 0.77 (4)   | C1'B—H1'C   | 0.9900    |
| C4—C4A      | 1.436 (3)  | C1'B—H1'D   | 0.9900    |
| C4—H4       | 0.9500     | C2'B—H2'C   | 0.9900    |
| C4"—C5"     | 1.392 (4)  | C2'B—H2'D   | 0.9900    |
|             |            |             |           |
| C3—O1—C1A   | 114.3 (2)  | C2"—C7"—C6" | 117.7 (2) |
| O1"—C1"—O3  | 125.4 (2)  | C2"—C7"—C9" | 121.1 (2) |
| O1"—C1"—C2" | 124.8 (2)  | C6"—C7"—C9" | 121.2 (2) |

|               |             |                |             |
|---------------|-------------|----------------|-------------|
| O3—C1"—C2"    | 109.79 (19) | O4—C8—C7       | 107.72 (18) |
| O1—C1A—C8A    | 110.9 (2)   | O4—C8—C8A      | 111.21 (19) |
| O1—C1A—H1AA   | 109.5       | C7—C8—C8A      | 109.82 (18) |
| C8A—C1A—H1AA  | 109.5       | O4—C8—H8       | 109.3       |
| O1—C1A—H1AB   | 109.5       | C7—C8—H8       | 109.3       |
| C8A—C1A—H1AB  | 109.5       | C8A—C8—H8      | 109.3       |
| H1AA—C1A—H1AB | 108.1       | O2"—C8"—H8"A   | 109.5       |
| C3"—O2"—C8"   | 114.1 (2)   | O2"—C8"—H8"B   | 109.5       |
| C7"—C2"—C3"   | 121.6 (2)   | H8"A—C8"—H8"B  | 109.5       |
| C7"—C2"—C1"   | 122.6 (2)   | O2"—C8"—H8"C   | 109.5       |
| C3"—C2"—C1"   | 115.8 (2)   | H8"A—C8"—H8"C  | 109.5       |
| C1"—O3—C7     | 119.03 (17) | H8"B—C8"—H8"C  | 109.5       |
| C5"—O3"—H3"O  | 113 (3)     | C1A—C8A—C4A    | 108.9 (2)   |
| C4—C3—O1      | 123.0 (2)   | C1A—C8A—C8     | 110.5 (2)   |
| C4—C3—C1'A    | 125.1 (3)   | C4A—C8A—C8     | 112.05 (19) |
| O1—C3—C1'A    | 111.7 (3)   | C1A—C8A—H8A    | 108.4       |
| C4—C3—C1'B    | 121.4 (6)   | C4A—C8A—H8A    | 108.4       |
| O1—C3—C1'B    | 110.8 (6)   | C8—C8A—H8A     | 108.4       |
| O2"—C3"—C2"   | 119.0 (2)   | C7—C9—H9A      | 109.5       |
| O2"—C3"—C4"   | 121.3 (2)   | C7—C9—H9B      | 109.5       |
| C2"—C3"—C4"   | 119.3 (2)   | H9A—C9—H9B     | 109.5       |
| C2'A—C3'—H3'A | 109.5       | C7—C9—H9C      | 109.5       |
| C2'A—C3'—H3'B | 109.5       | H9A—C9—H9C     | 109.5       |
| H3'A—C3'—H3'B | 109.5       | H9B—C9—H9C     | 109.5       |
| C2'A—C3'—H3'C | 109.5       | C7"—C9"—H9"A   | 109.5       |
| H3'A—C3'—H3'C | 109.5       | C7"—C9"—H9"B   | 109.5       |
| H3'B—C3'—H3'C | 109.5       | H9"A—C9"—H9"B  | 109.5       |
| C8—O4—H4O     | 108 (3)     | C7"—C9"—H9"C   | 109.5       |
| C3—C4—C4A     | 121.9 (2)   | H9"A—C9"—H9"C  | 109.5       |
| C3—C4—H4      | 119.0       | H9"B—C9"—H9"C  | 109.5       |
| C4A—C4—H4     | 119.0       | C2'A—C1'A—C3   | 114.6 (5)   |
| C5"—C4"—C3"   | 120.7 (2)   | C2'A—C1'A—H1'A | 108.6       |
| C5"—C4"—C11   | 118.49 (19) | C3—C1'A—H1'A   | 108.6       |
| C3"—C4"—C11   | 120.71 (19) | C2'A—C1'A—H1'B | 108.6       |
| C5—C4A—C4     | 123.2 (2)   | C3—C1'A—H1'B   | 108.6       |
| C5—C4A—C8A    | 121.9 (2)   | H1'A—C1'A—H1'B | 107.6       |
| C4—C4A—C8A    | 114.9 (2)   | C1'A—C2'A—C3'  | 114.7 (5)   |

|             |             |                |         |
|-------------|-------------|----------------|---------|
| C4A—C5—C6   | 122.8 (2)   | C1'A—C2'A—H2'A | 108.6   |
| C4A—C5—H5   | 118.6       | C3'—C2'A—H2'A  | 108.6   |
| C6—C5—H5    | 118.6       | C1'A—C2'A—H2'B | 108.6   |
| O3"—C5"—C4" | 123.6 (2)   | C3'—C2'A—H2'B  | 108.6   |
| O3"—C5"—C6" | 118.0 (2)   | H2'A—C2'A—H2'B | 107.6   |
| C4"—C5"—C6" | 118.3 (2)   | C2'B—C1'B—C3   | 109 (2) |
| O2—C6—C5    | 123.2 (2)   | C2'B—C1'B—H1'C | 110.0   |
| O2—C6—C7    | 119.8 (2)   | C3—C1'B—H1'C   | 110.0   |
| C5—C6—C7    | 116.9 (2)   | C2'B—C1'B—H1'D | 110.0   |
| C7"—C6"—C5" | 122.3 (2)   | C3—C1'B—H1'D   | 110.0   |
| C7"—C6"—C12 | 119.76 (18) | H1'C—C1'B—H1'D | 108.4   |
| C5"—C6"—C12 | 117.92 (18) | C1'B—C2'B—C3'  | 107 (3) |
| O3—C7—C9    | 103.80 (18) | C1'B—C2'B—H2'C | 110.2   |
| O3—C7—C8    | 109.62 (17) | C3'—C2'B—H2'C  | 110.2   |
| C9—C7—C8    | 112.6 (2)   | C1'B—C2'B—H2'D | 110.2   |
| O3—C7—C6    | 110.85 (18) | C3'—C2'B—H2'D  | 110.2   |
| C9—C7—C6    | 107.64 (19) | H2'C—C2'B—H2'D | 108.5   |
| C8—C7—C6    | 112.06 (18) |                |         |

Table S5. Hydrogen-bond geometry (Å, °) for compound **5**.

| $D-H\cdots A$                     | $D-H$    | $H\cdots A$ | $D\cdots A$ | $D-H\cdots A$ |
|-----------------------------------|----------|-------------|-------------|---------------|
| O3"—H3" $O\cdots$ C11             | 0.80 (4) | 2.58 (4)    | 2.989 (2)   | 113 (3)       |
| O3"—H3" $O\cdots$ O4 <sup>i</sup> | 0.80 (4) | 2.11 (4)    | 2.769 (2)   | 139 (3)       |
| O4—H4 $O\cdots$ O2 <sup>ii</sup>  | 0.77 (4) | 2.04 (4)    | 2.804 (2)   | 171 (4)       |

Symmetry codes: (i)  $x-1/2, -y+3/2, -z+2$ ; (ii)  $-x+1, y+1/2, -z+3/2$ .
